# Supplementary material for: Functional tuning of phenothiazine-based dyes by a benzimidazole auxiliary chromophore: an account of optical and photovoltaic studies
Source: Royal Society of Chemistry journal article supplement (doi:10.1039/c4ra09300c), 2014-10-14
Supplement: c4ra09300c1.pdf [file c4ra09300c1.pdf]

## Functional Tuning of Phenothiazine-Based Dyes by Benzimidazole Auxiliary

### Chromophore: an Account on Optical and Photovoltaic Studies<sup>†</sup>

Govardhana Babu Bodedla,<sup>a</sup> K. R. Justin Thomas,<sup>\*a</sup> Chun-Ting Li<sup>b</sup> and Kuo-Chuan Ho<sup>b</sup>

<sup>a</sup> *Organic Materials Chemistry, Department of Chemistry, Indian Institute of Technology Roorkee,*

*Roorkee – 247 667, India*

<sup>b</sup> *Department of Chemical Engineering, National Taiwan University, Taipei 10617, Taiwan.*

### Electronic Supplementary Information

|                                                                                                          |     |
|----------------------------------------------------------------------------------------------------------|-----|
| <b>Fig. S1</b> Absorption spectra of <b>GJ2</b> recorded in different solvents.                          | S3  |
| <b>Fig. S2</b> Absorption spectra of <b>GJ3</b> recorded in different solvents.                          | S3  |
| <b>Fig. S3</b> Absorption spectra of <b>GJ4</b> recorded in different solvents.                          | S4  |
| <b>Fig. S4</b> Absorption spectra of <b>GJ5</b> recorded in different solvents.                          | S4  |
| <b>Fig. S5</b> Absorption spectra of <b>GJ1</b> recorded in THF before and after addition of TFA or TEA. | S5  |
| <b>Fig. S6</b> Absorption spectra of <b>GJ3</b> recorded in THF before and after addition of TFA or TEA. | S5  |
| <b>Fig. S7</b> Absorption spectra of <b>GJ4</b> recorded in THF before and after addition of TFA or TEA. | S6  |
| <b>Fig. S8</b> Absorption spectra of <b>GJ5</b> recorded in THF before and after addition of TFA or TEA. | S6  |
| <b>Fig. S9</b> <sup>1</sup> H NMR spectra of <b>2</b> .                                                  | S7  |
| <b>Fig. S10</b> <sup>13</sup> C NMR spectra of <b>2</b> .                                                | S8  |
| <b>Fig. S11</b> <sup>1</sup> H NMR spectra of <b>6</b> .                                                 | S9  |
| <b>Fig. S12</b> <sup>13</sup> C NMR spectra of <b>6</b> .                                                | S10 |
| <b>Fig. S13</b> <sup>1</sup> H NMR spectra of <b>3</b> .                                                 | S11 |
| <b>Fig. S14</b> <sup>13</sup> C NMR spectra of <b>3</b> .                                                | S12 |
| <b>Fig. S15</b> <sup>1</sup> H NMR spectra of <b>4</b> .                                                 | S13 |
| <b>Fig. S16</b> <sup>13</sup> C NMR spectra of <b>4</b> .                                                | S14 |
| <b>Fig. S17</b> <sup>1</sup> H NMR spectra of <b>5</b> .                                                 | S15 |
| <b>Fig. S18</b> <sup>13</sup> C NMR spectra of <b>5</b> .                                                | S16 |
| <b>Fig. S19</b> <sup>1</sup> H NMR spectra of <b>8</b> .                                                 | S17 |
| <b>Fig. S20</b> <sup>13</sup> C NMR spectra of <b>8</b> .                                                | S18 |
| <b>Fig. S21</b> <sup>1</sup> H NMR spectra of <b>10</b> .                                                | S19 |
| <b>Fig. S22</b> <sup>13</sup> C NMR spectra of <b>10</b> .                                               | S20 |
| <b>Fig. S23</b> <sup>1</sup> H NMR spectra of <b>GJ1</b> .                                               | S21 |
| <b>Fig. S24</b> <sup>13</sup> C NMR spectra of <b>GJ1</b> .                                              | S22 |
| <b>Fig. S25</b> <sup>1</sup> H NMR spectra of <b>GJ2</b> .                                               | S23 |
| <b>Fig. S26</b> <sup>13</sup> C NMR spectra of <b>GJ2</b> .                                              | S24 |

|                                                                            |     |
|----------------------------------------------------------------------------|-----|
| <b>Fig. S27</b> $^1\text{H}$ NMR spectra of <b>GJ3</b> .                   | S25 |
| <b>Fig. S28</b> $^{13}\text{C}$ NMR spectra of <b>GJ3</b> .                | S26 |
| <b>Fig. S29</b> $^1\text{H}$ NMR spectra of <b>GJ4</b> .                   | S27 |
| <b>Fig. S30</b> $^{13}\text{C}$ NMR spectra of <b>GJ4</b> .                | S28 |
| <b>Fig. S31</b> $^1\text{H}$ NMR spectra of <b>GJ5</b> .                   | S29 |
| <b>Fig. S32</b> $^{13}\text{C}$ NMR spectra of <b>GJ5</b> .                | S30 |
| Table S1 Cartesian coordinates for the optimized structure of <b>GJ1</b> . | S31 |
| Table S2 Cartesian coordinates for the optimized structure of <b>GJ2</b> . | S33 |
| Table S3 Cartesian coordinates for the optimized structure of <b>GJ3</b> . | S35 |
| Table S4 Cartesian coordinates for the optimized structure of <b>GJ4</b> . | S37 |
| Table S5 Cartesian coordinates for the optimized structure of <b>GJ5</b> . | S39 |

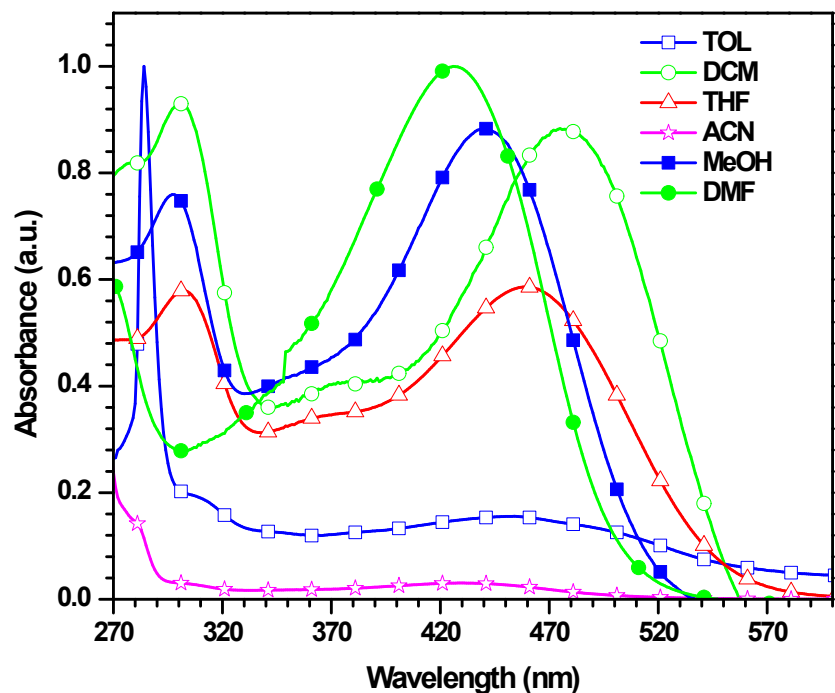

Fig. S1 Absorption spectra of **GJ2** recorded in different solvents.

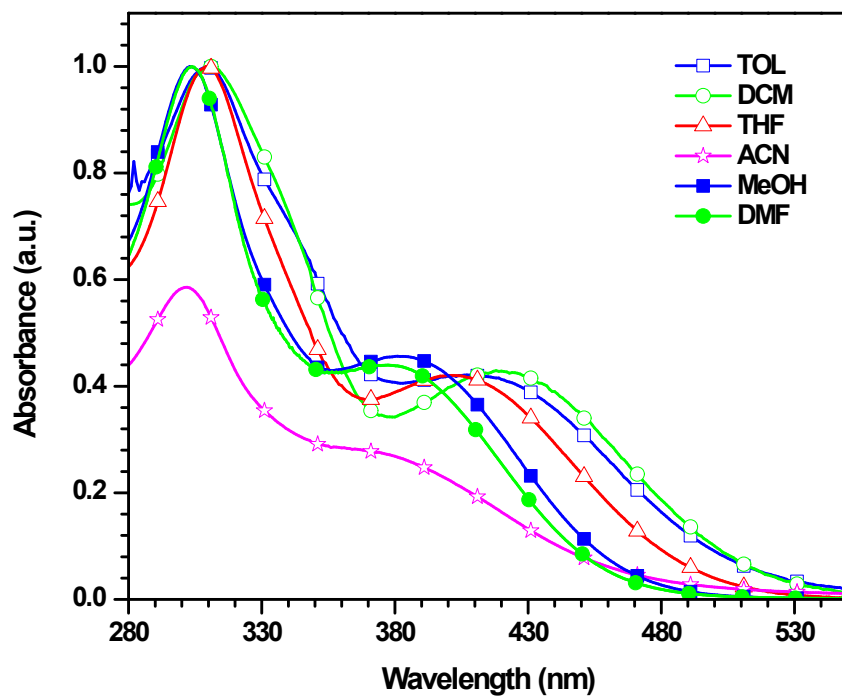

Fig. S2 Absorption spectra of **GJ3** recorded in different solvents.

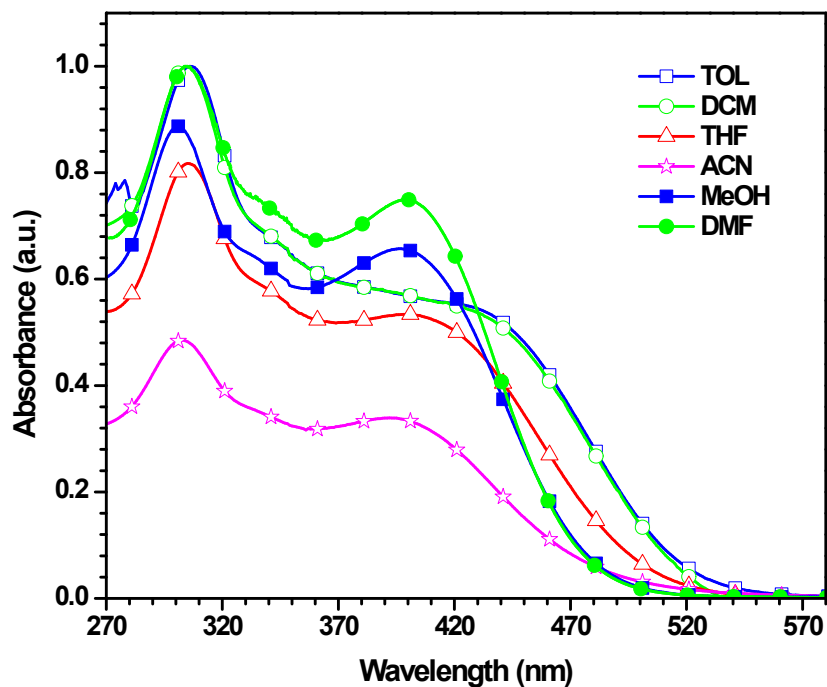

Fig. S3 Absorption spectra of **GJ4** recorded in different solvents.

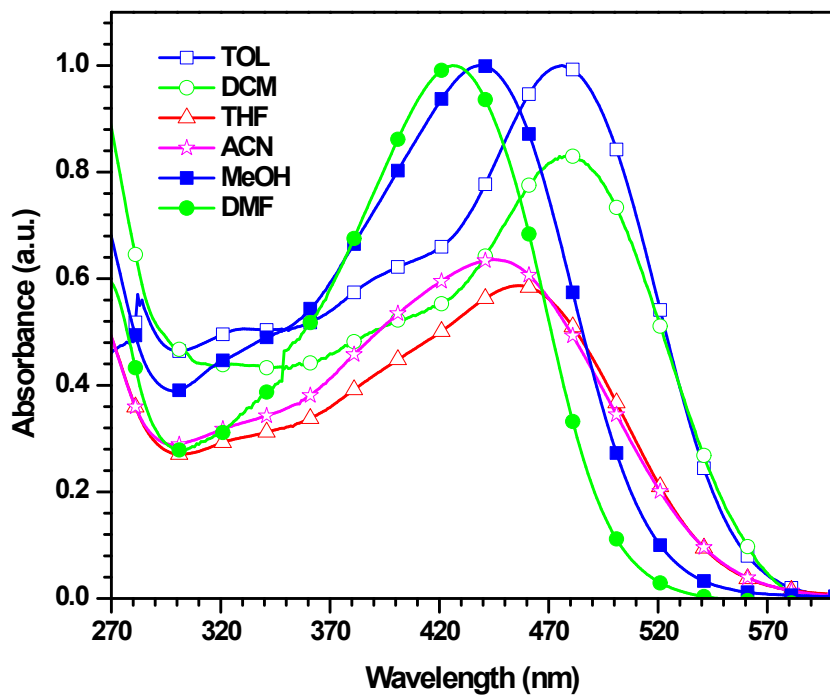

Fig. S4 Absorption spectra of **GJ5** recorded in different solvents.

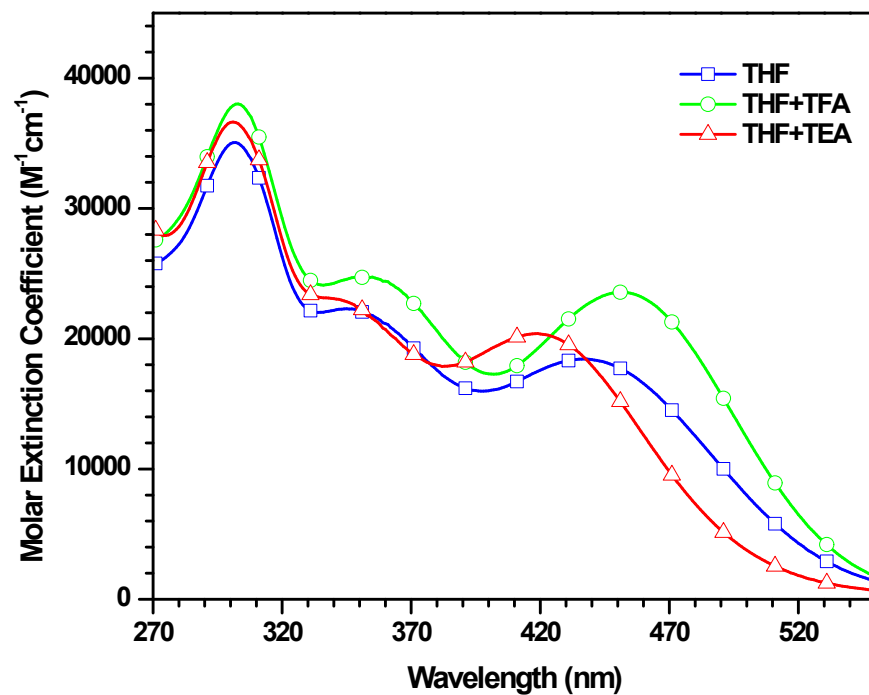

Fig. S5 Absorption spectra of **GJ1** recorded in THF before and after addition of TFA or TEA.

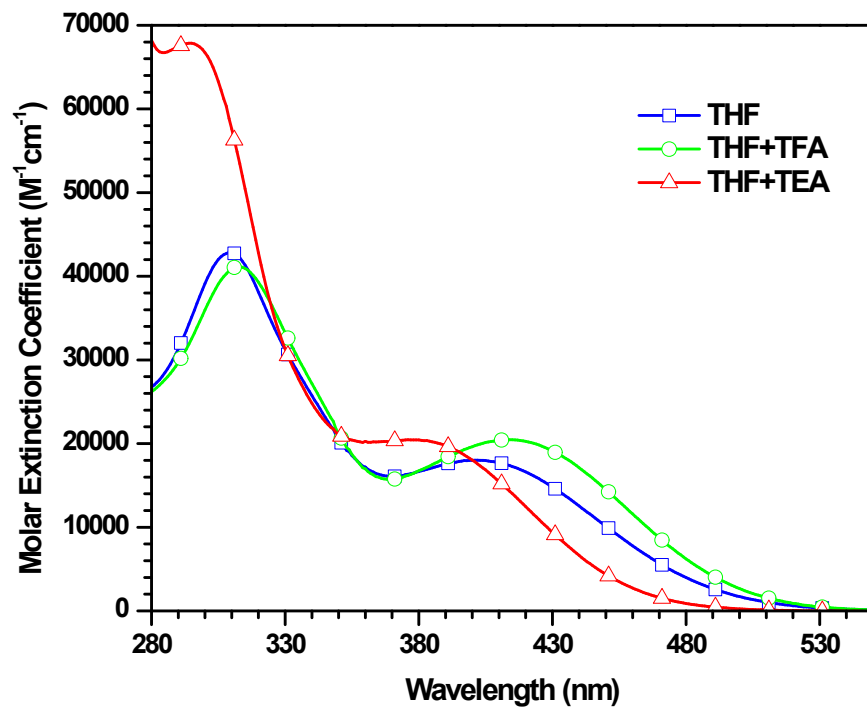

Fig. S6 Absorption spectra of **GJ3** recorded in THF before and after addition of TFA or TEA.

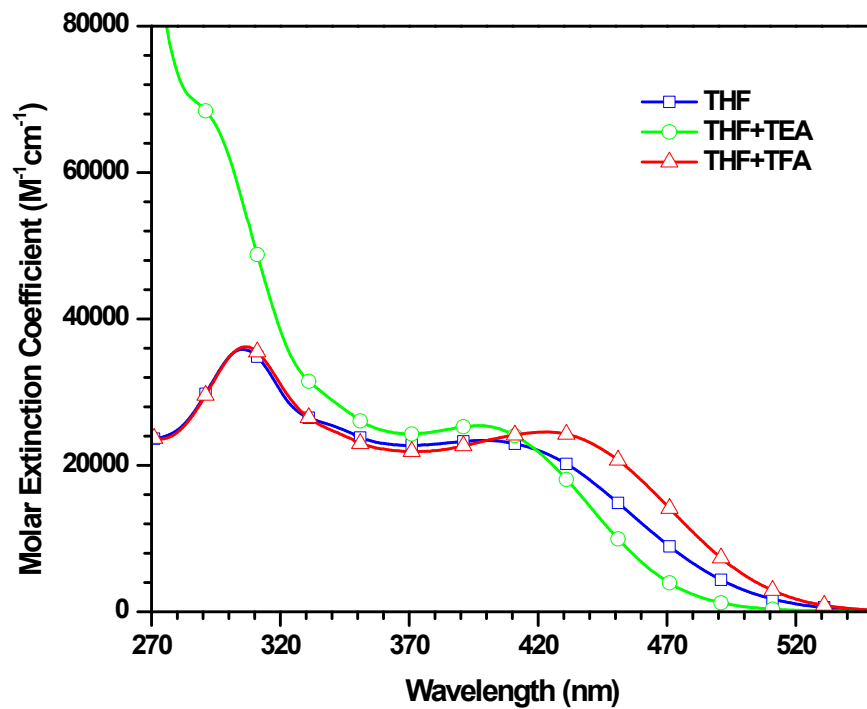

Fig. S7 Absorption spectra of the dye **GJ4** recorded in THF before and after addition of TFA or TEA.

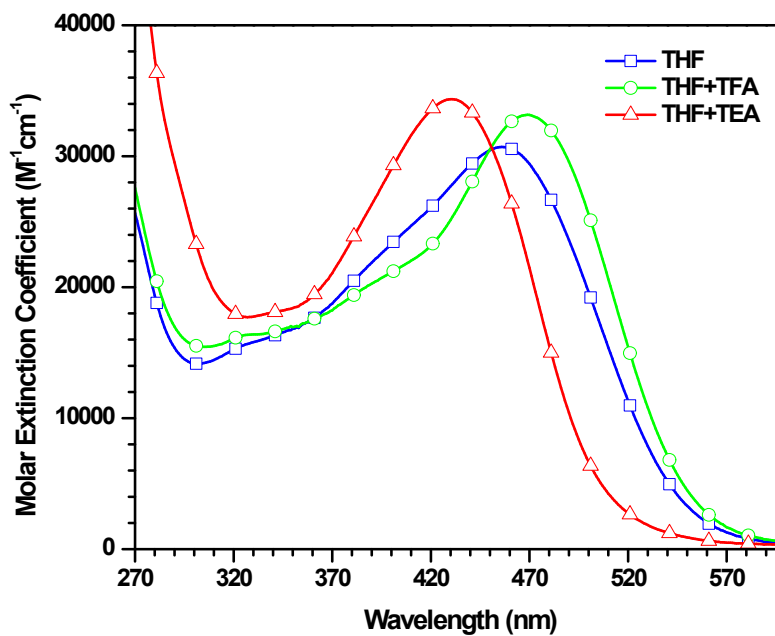

Fig. S8 Absorption spectra of the dye **GJ5** recorded in THF before and after addition of TFA or TEA.

GB-1-10 S.T

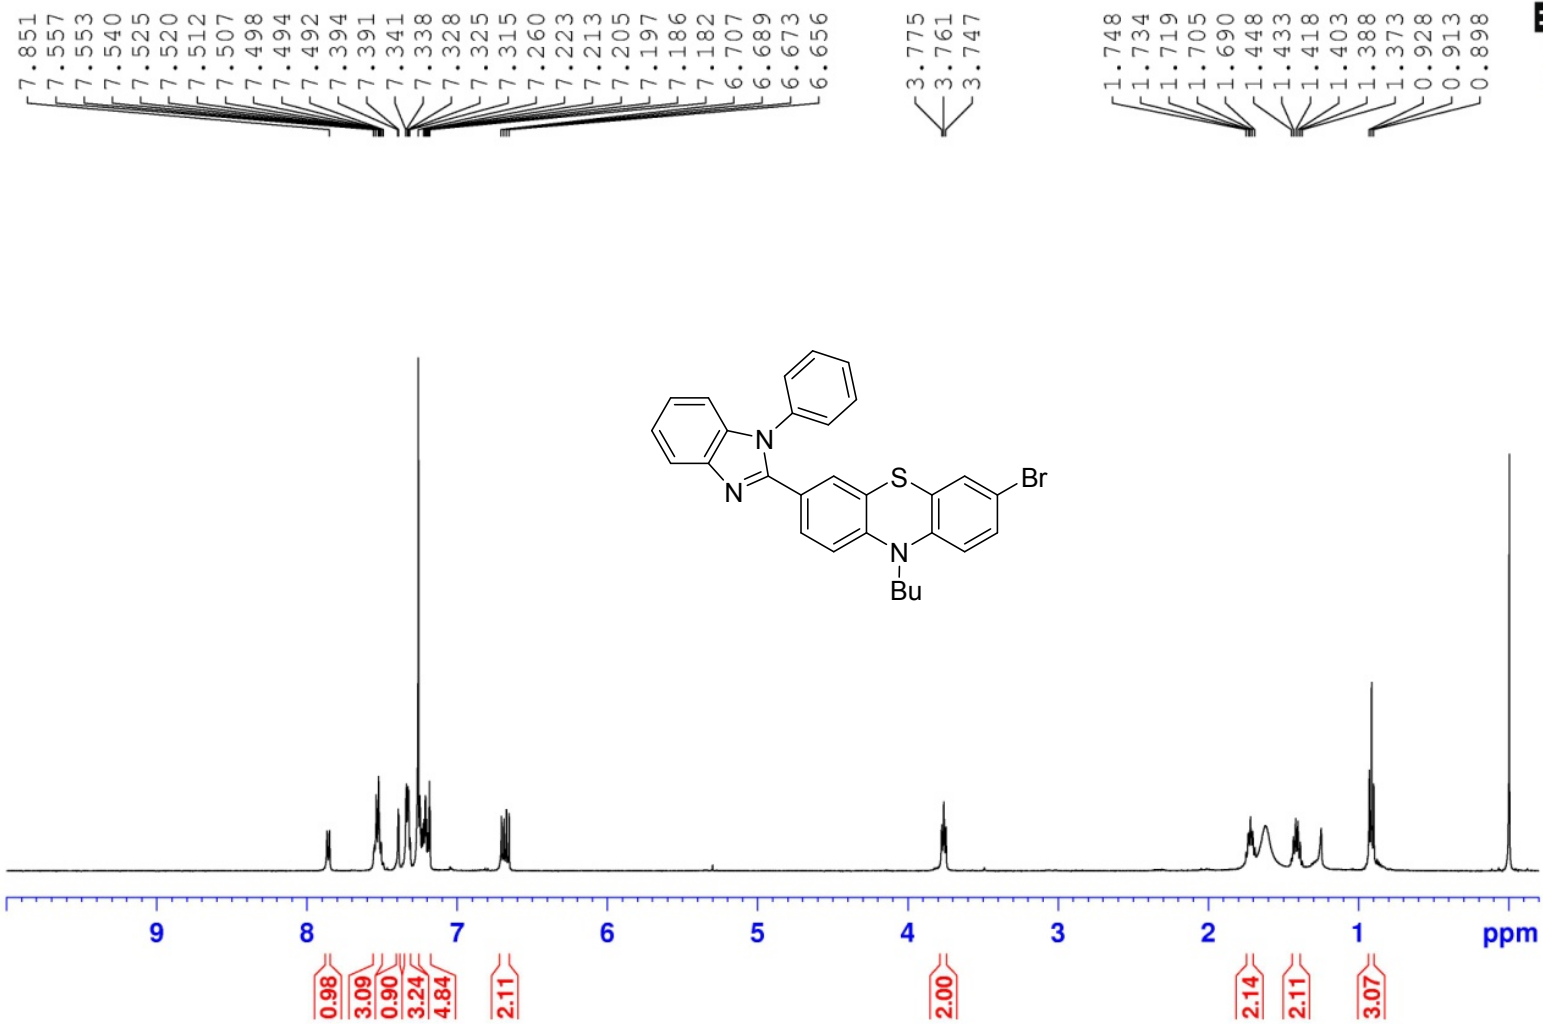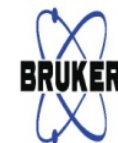

NAME: GB-1-10  
 EXPNO: 1  
 PROCNO: 1  
 F2 - Acquisition Parameters  
 Date\_Time: 11/11/11 11:11:11  
 File: GB-1-10  
 Name: GB-1-10  
 Solvent: CDCl3  
 Conv: 0.000000  
 Gain: 1.000000  
 Freq: 500.135  
 P1: 12.00  
 P2: 0.00  
 SFO: 500.135  
 AQC: 0.000000  
 FIDRES: 0.000000  
 AQRES: 0.000000  
 SCA: 0.000000  
 F2 - Processing parameters  
 Date\_Time: 11/11/11 11:11:11  
 File: GB-1-10  
 Name: GB-1-10  
 Solvent: CDCl3  
 Conv: 0.000000  
 Gain: 1.000000  
 Freq: 500.135  
 P1: 12.00  
 P2: 0.00  
 SFO: 500.135  
 AQC: 0.000000  
 FIDRES: 0.000000  
 AQRES: 0.000000  
 SCA: 0.000000

Fig. S9 <sup>1</sup>H NMR spectra of 2.

GB-1-31 C13

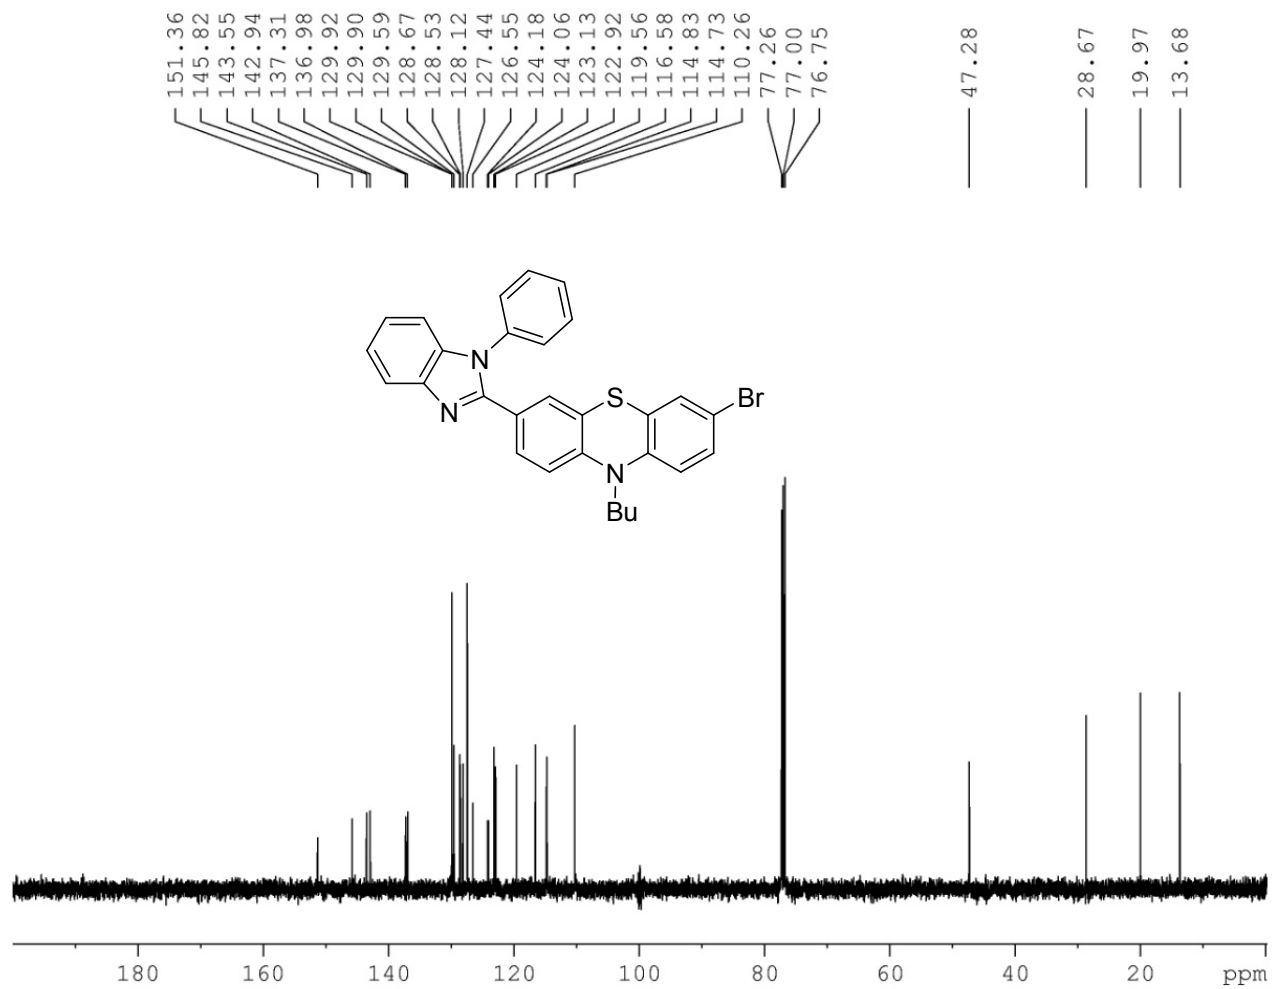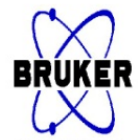

Fig. S10 <sup>13</sup>C NMR spectra of 2.



GB-1-16

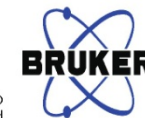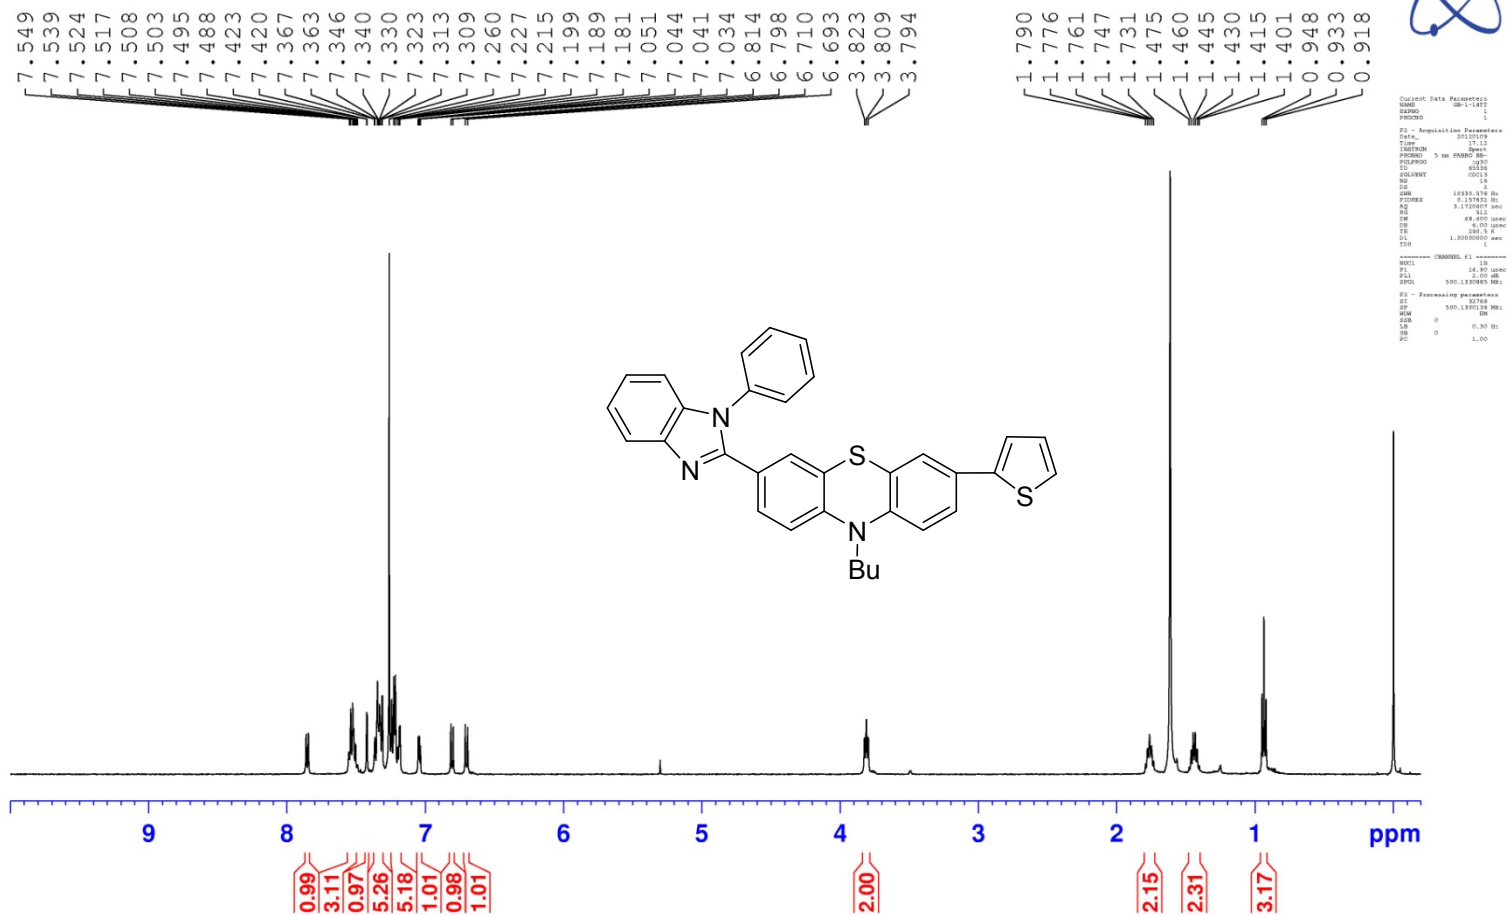

Fig. S11 <sup>13</sup>C NMR spectra of 6.

GB-1-33 13C

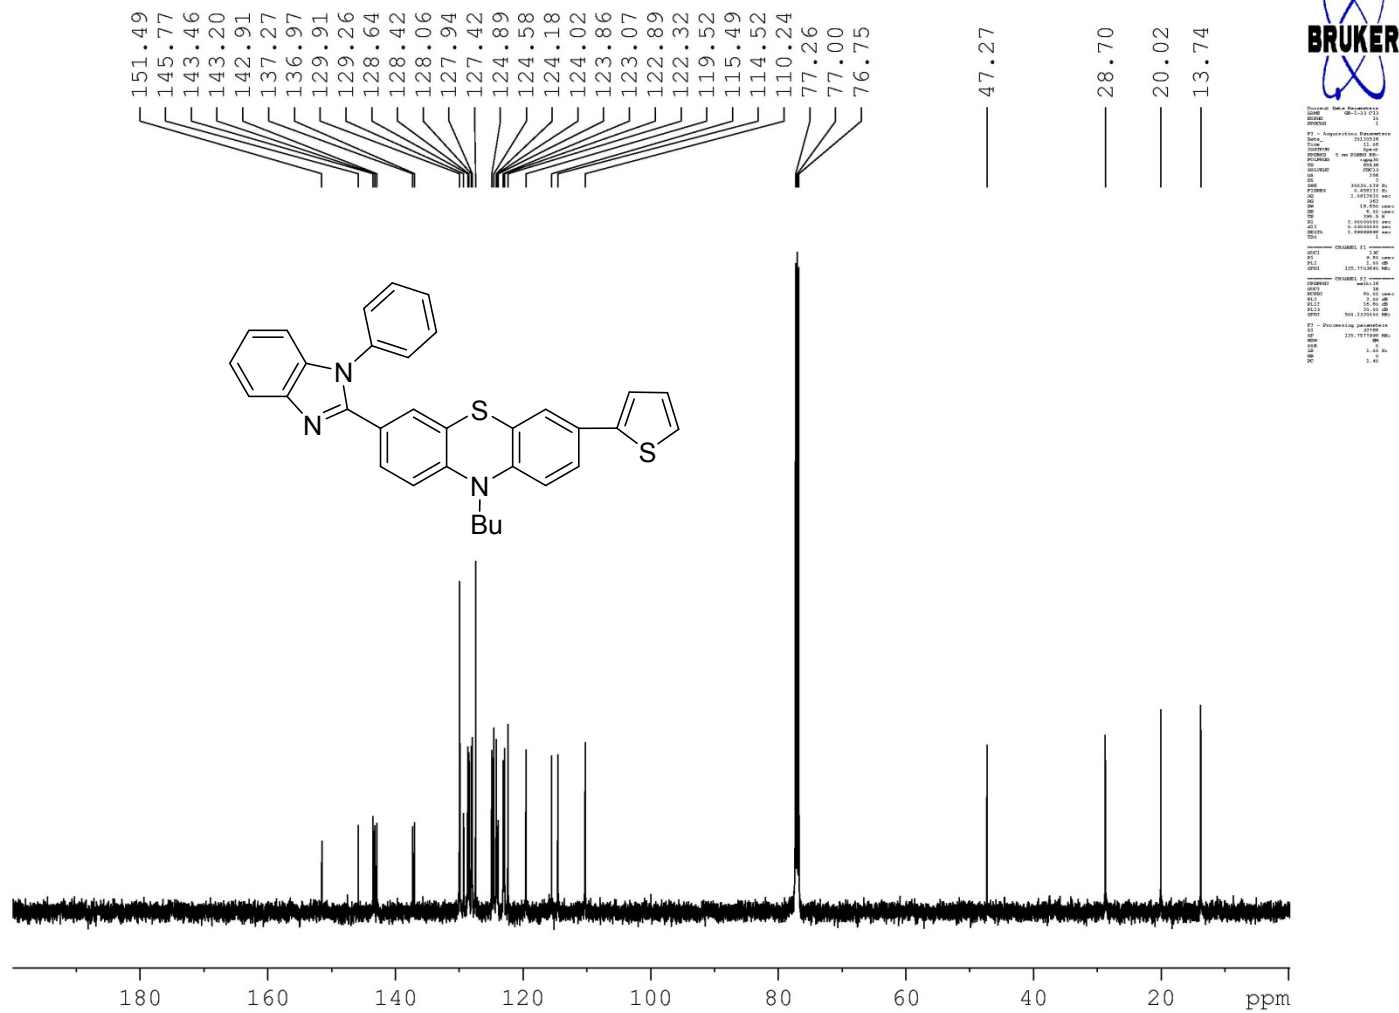

Fig. S12 <sup>13</sup>C NMR spectra of 6.



GB-1-26 C13

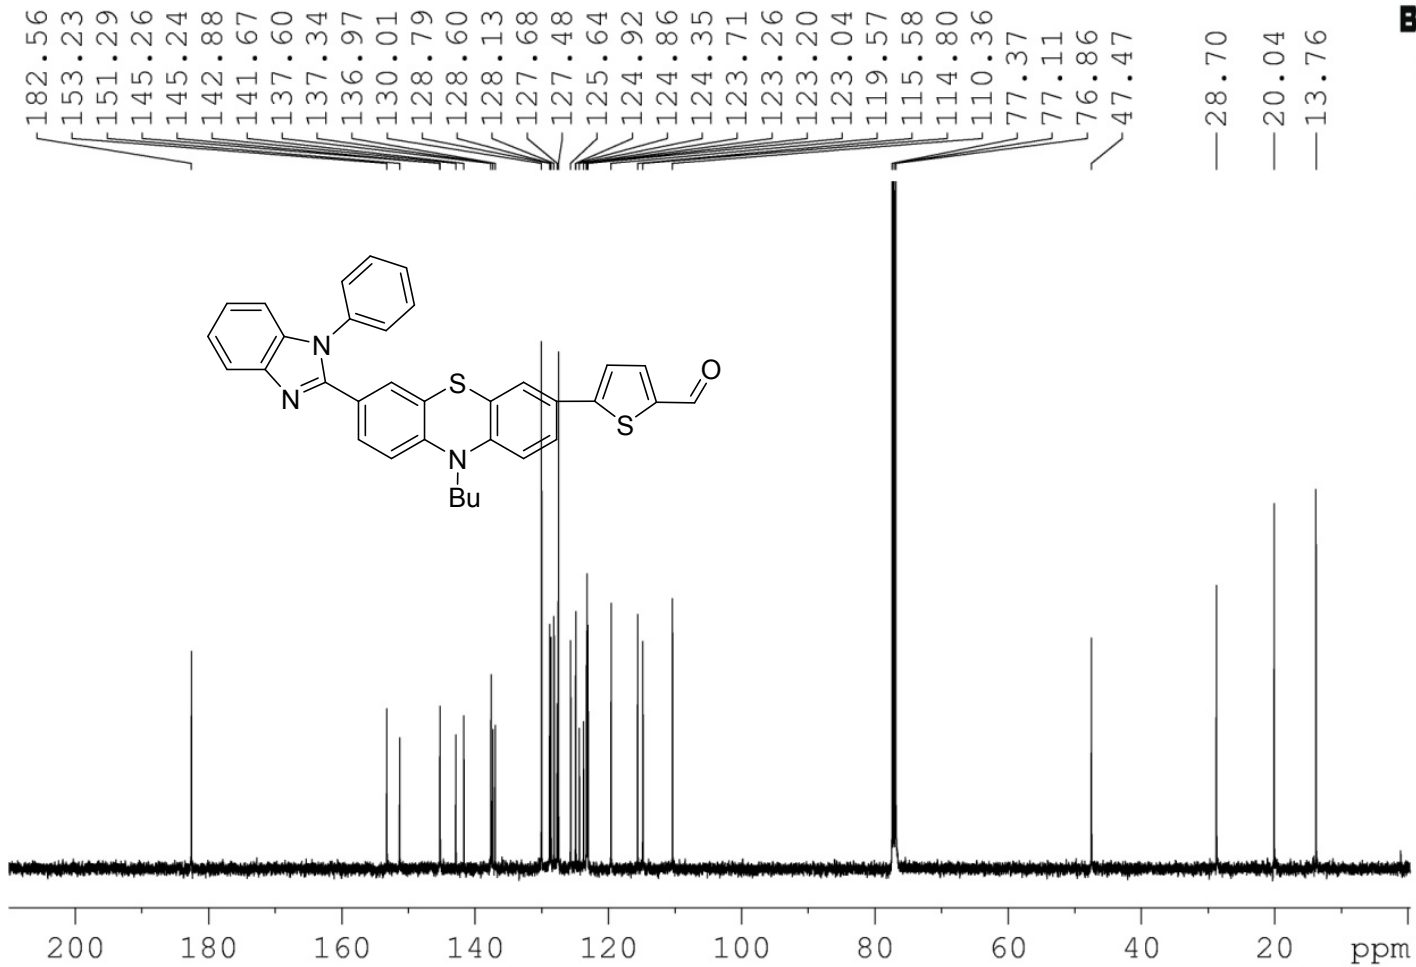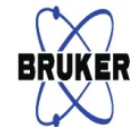

```

Current Data Parameters
NAME      GB-1-26 C13
EXPNO    10
PROCNO   3

F2 - Acquisition Parameters
Date_    2012055
Time     20.43
INSTRUM  spect
PROBHD   5 mm PABBO BB-
PULPROG  zgpg30
TD        65536
SOLVENT  CDCl3
NS        396
DS        4
SWH       30000.000 Hz
F2SHIFT   0.496212 Hz
AQ        1.0912410 sec
RG        600
SI        16.000 usec
SF        125.760 MHz
DE        4.50 usec
TE        300.2 K
D1        2.0000000 sec
D11       0.0300000 sec
TDO       1

----- CHANNEL f1 -----
NUC1      13C
P1        2.00 usec
PL1       0.00 dB
PL12      64.44891073 W
PL13      129.7702643 MHz

----- CHANNEL f2 -----
CPDPRG2  waltz16
NUC2      1H
PCPD2    80.00 usec
PL2       2.00 dB
PL12      16.60 dB
PL13      20.00 dB
PL14      20.00 dB
PL15      14.3724056 W
PL16      0.36261889 W
PL17      0.2173326 W
PL18      500.1320000 MHz

F2 - Processing parameters
SI        32768
SF        125.7678000 MHz
WDW       EM
SSB       0
GB        1.00 Hz
CR        0
PC        1.40
    
```

Fig. S14 <sup>13</sup>C NMR spectra of 3.

GB-1-57

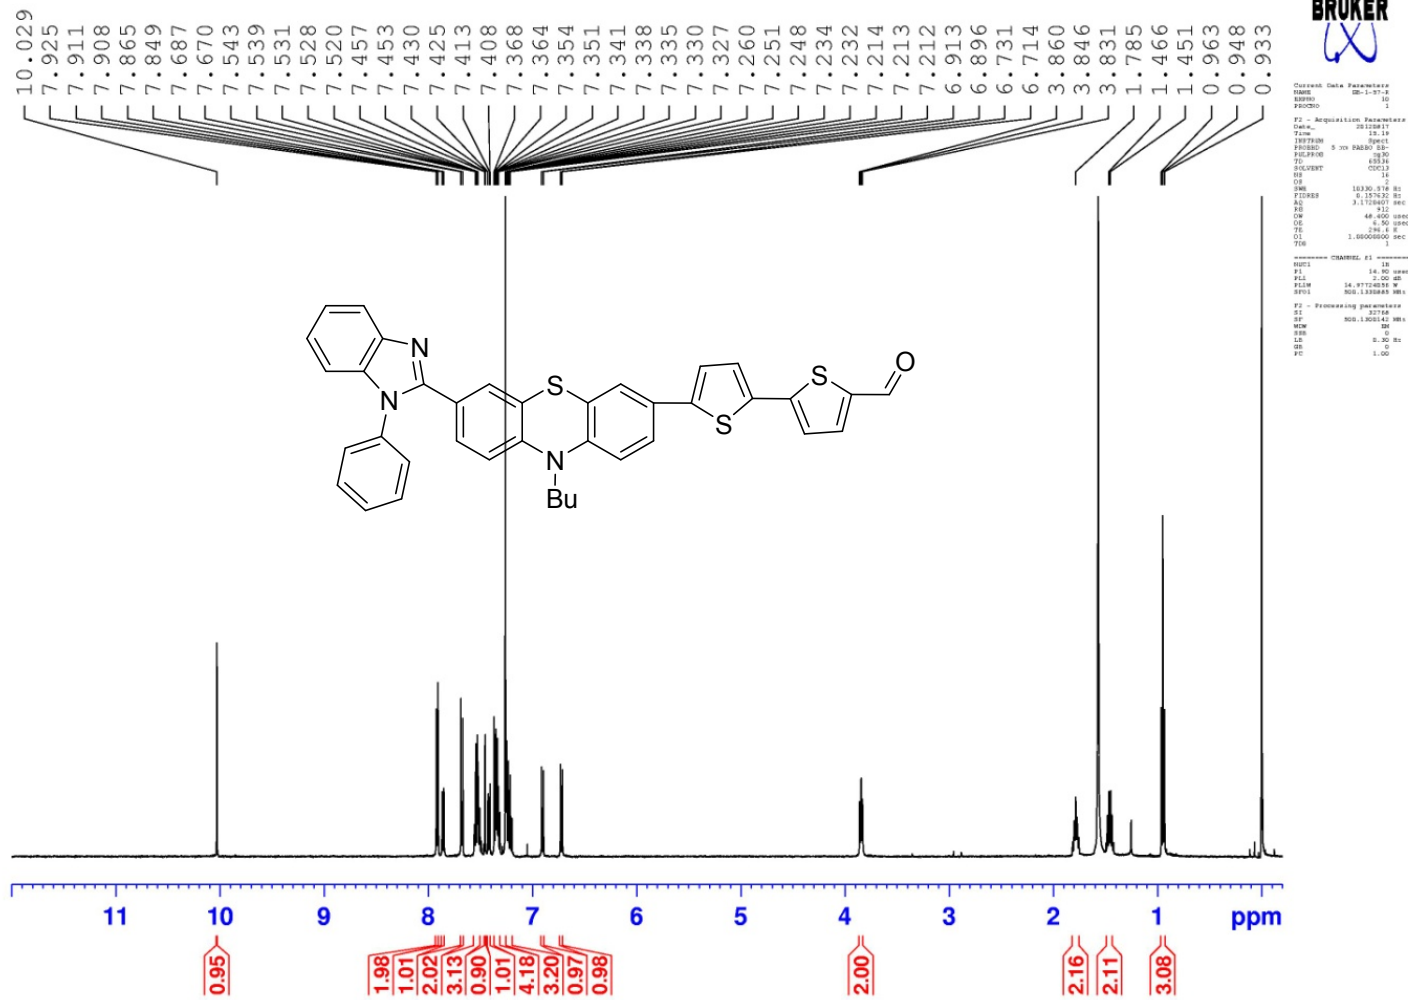

Fig. S15 <sup>1</sup>H NMR spectra of 4.

GB-1-57 C13

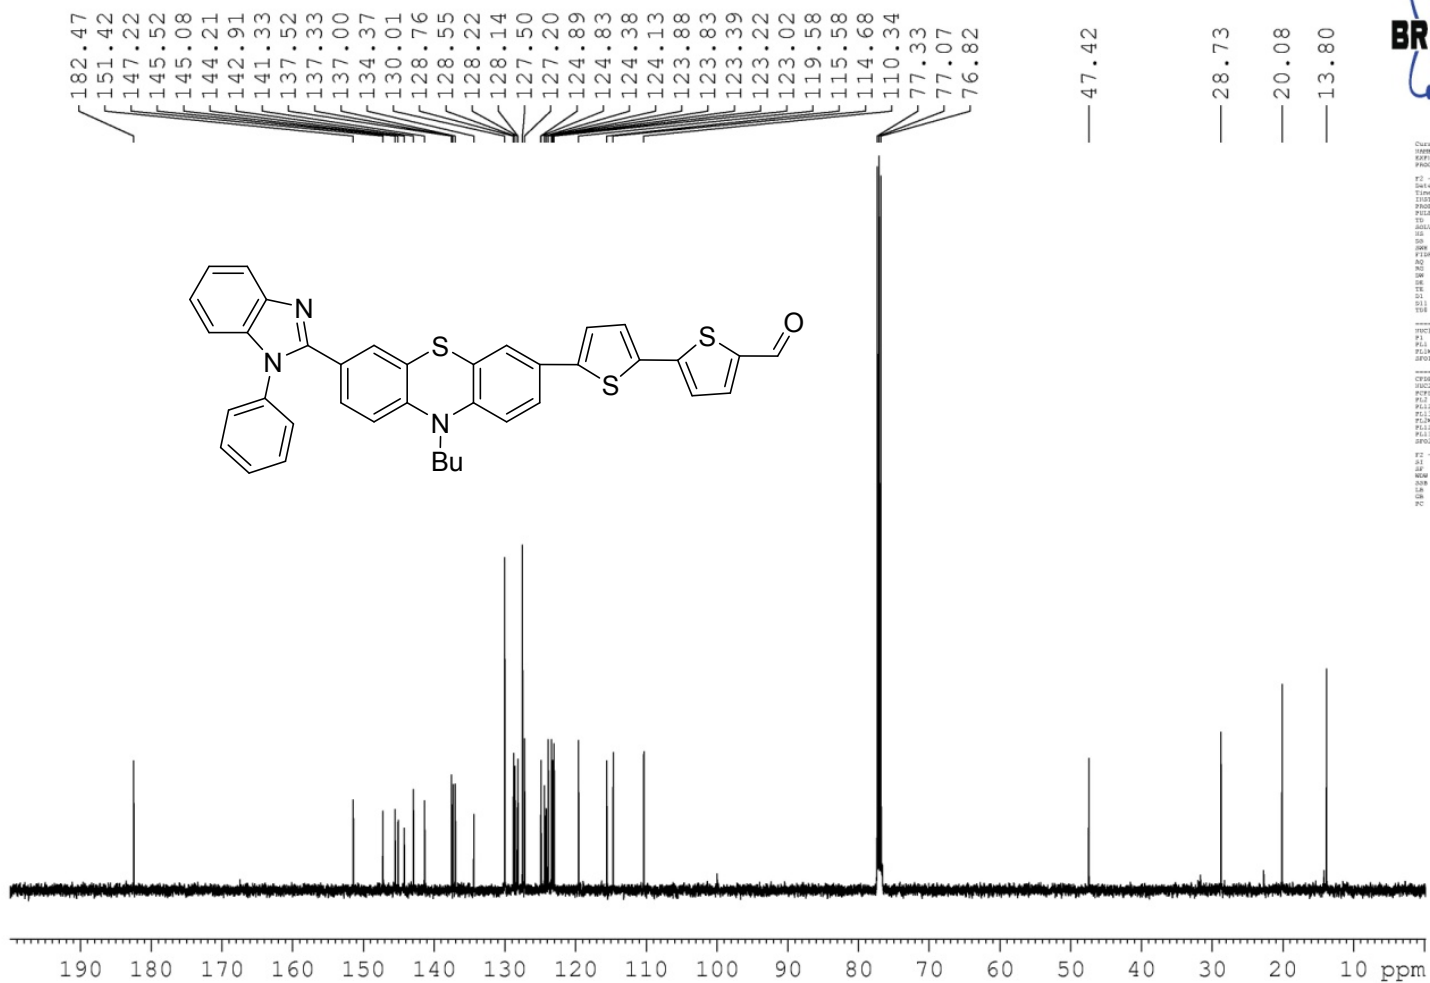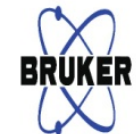

Fig. S16 <sup>13</sup>C NMR spectra of 4.

GB-1-56

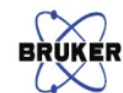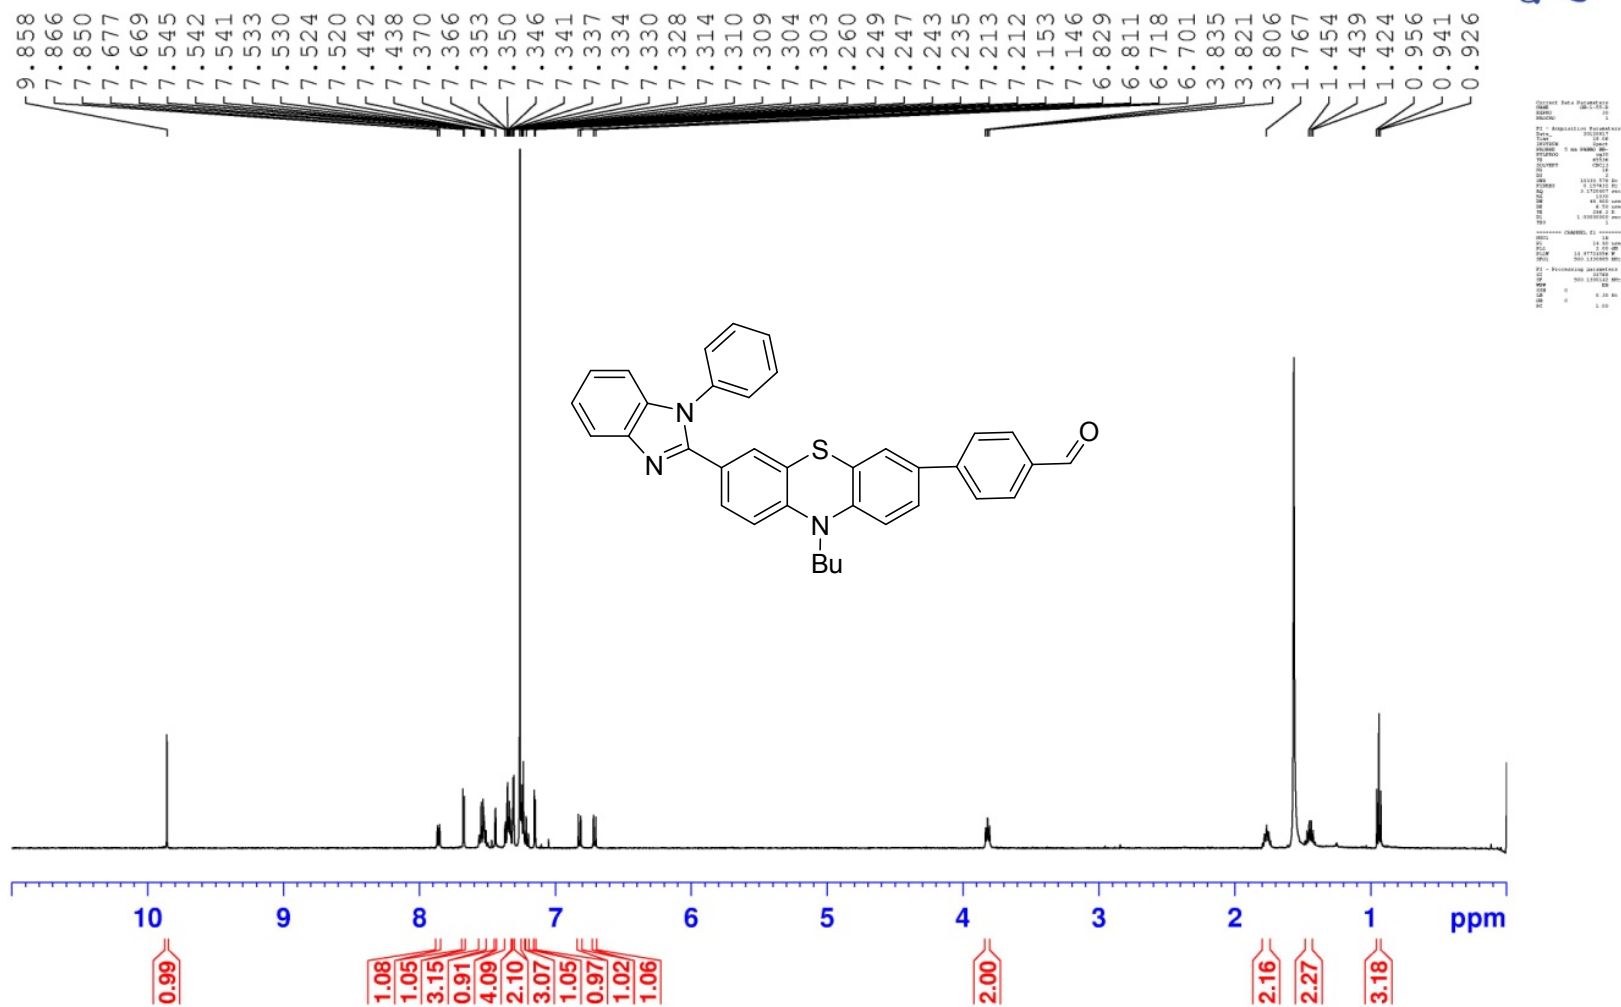

Fig. S17 <sup>1</sup>H NMR spectra of 5.

GB-1-56 C13

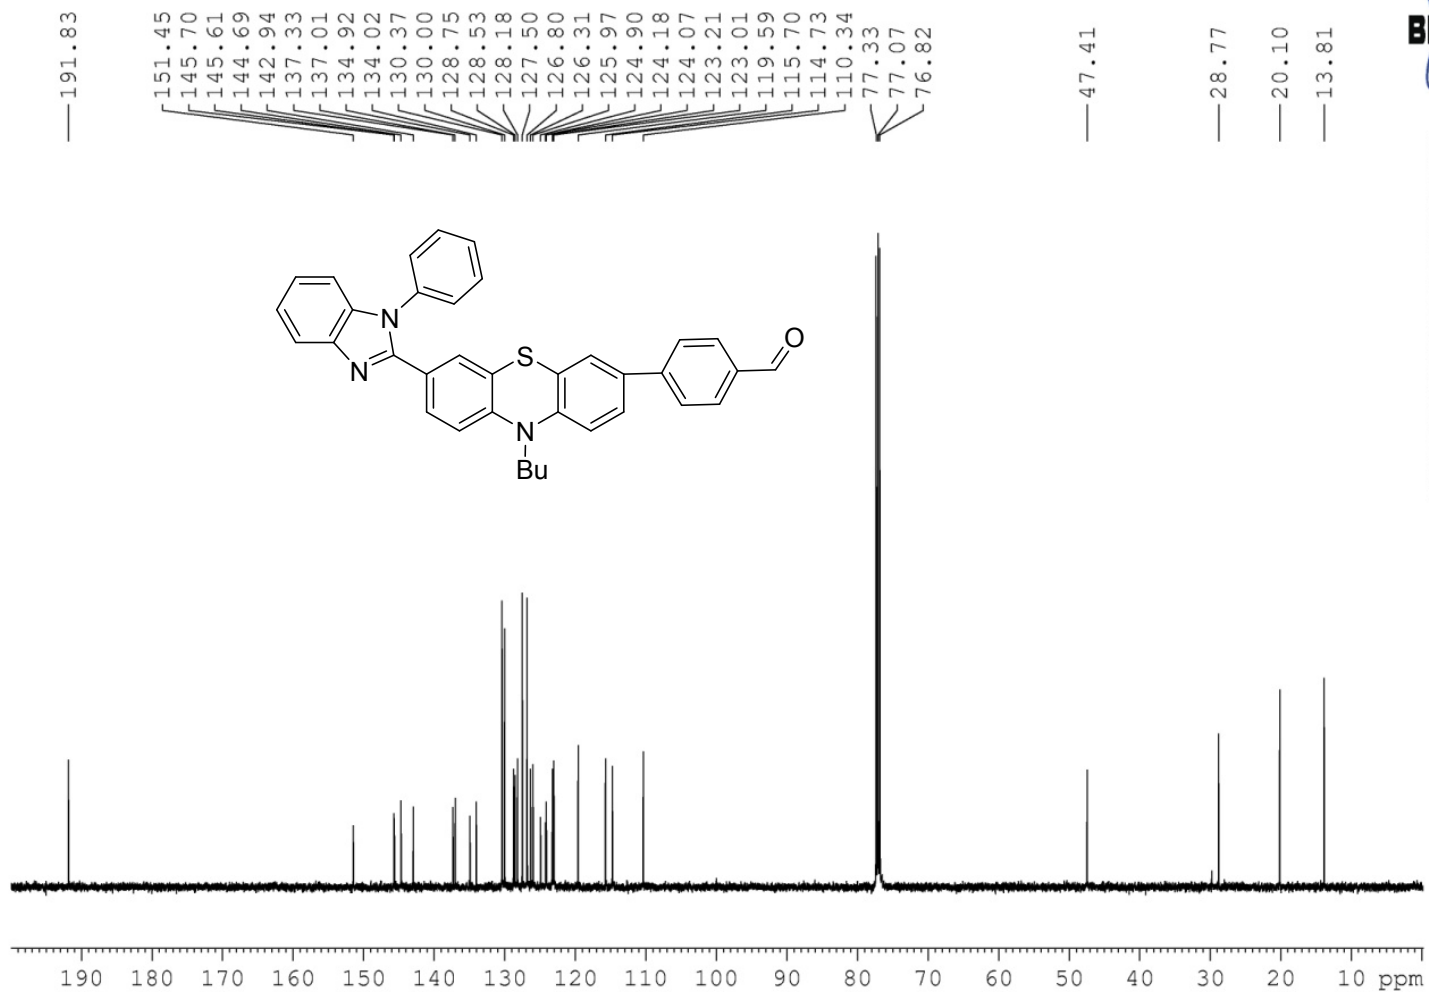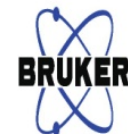

```
Current Data Parameters
NAME      GB-1-56 C13
EXPNO    1
PROCNO   1
F2 - Acquisition Parameters
Date_    20120213
Time     11.45
INSTRUM  spect
PROBHD   5 mm BBOBO
PULPROG  zgpg30
TD        65536
SOLVENT  DMSO
AQ        0.412
RG        612
DS        4
SWH       30050.574 Hz
FIDRES    0.488222 Hz
AQ         1.091410 sec
RG         1460
DS         16
SFO        125.760441 MHz
DE         4.50 usec
TE         300.2 K
D1         2.0000000 sec
d11        0.3300000 sec
TD0
===== CHANNEL f1 =====
NUC1       13
P1         1.00 usec
PL1        0.00 dB
PL12       14.00 dB
PL13       14.00 dB
PL14       14.00 dB
PL15       14.00 dB
PL16       14.00 dB
PL17       14.00 dB
PL18       14.00 dB
PL19       14.00 dB
PL20       14.00 dB
PL21       14.00 dB
PL22       14.00 dB
PL23       14.00 dB
PL24       14.00 dB
PL25       14.00 dB
PL26       14.00 dB
PL27       14.00 dB
PL28       14.00 dB
PL29       14.00 dB
PL30       14.00 dB
===== CHANNEL f2 =====
NUC2       13
P2         1.00 usec
PL2        0.00 dB
PL22       14.00 dB
PL23       14.00 dB
PL24       14.00 dB
PL25       14.00 dB
PL26       14.00 dB
PL27       14.00 dB
PL28       14.00 dB
PL29       14.00 dB
PL30       14.00 dB
F2 - Processing parameters
SI         32768
SF         125.757980 MHz
WDW        EM
SSB        0
LB         1.00 Hz
GB         0
PC         1.40
```

Fig. S18 <sup>13</sup>C NMR spectra of 5.



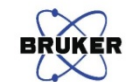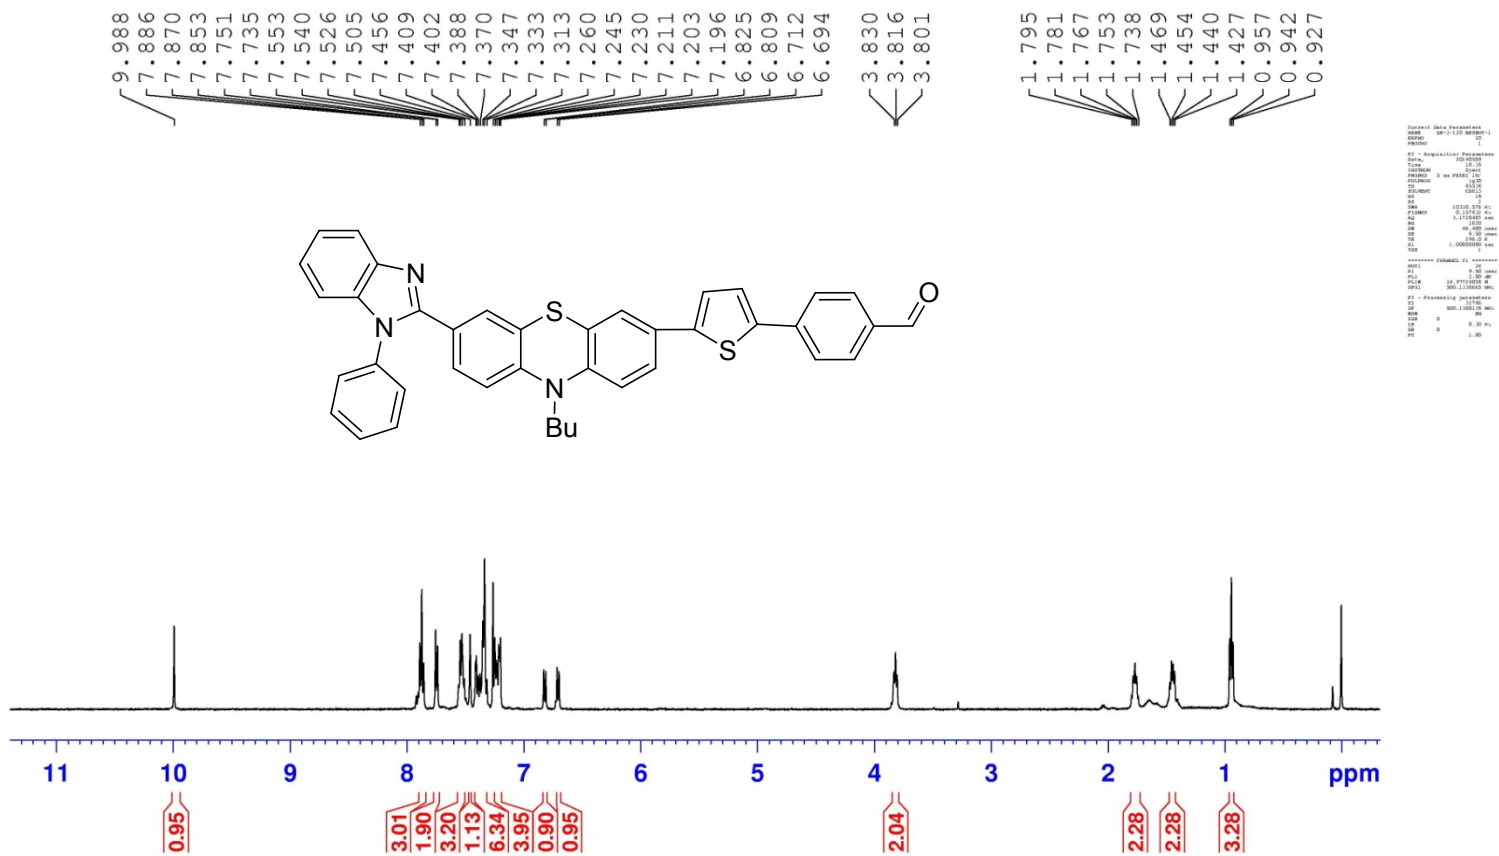

Fig. S19 <sup>1</sup>H NMR spectra of 8.



GB-1-125

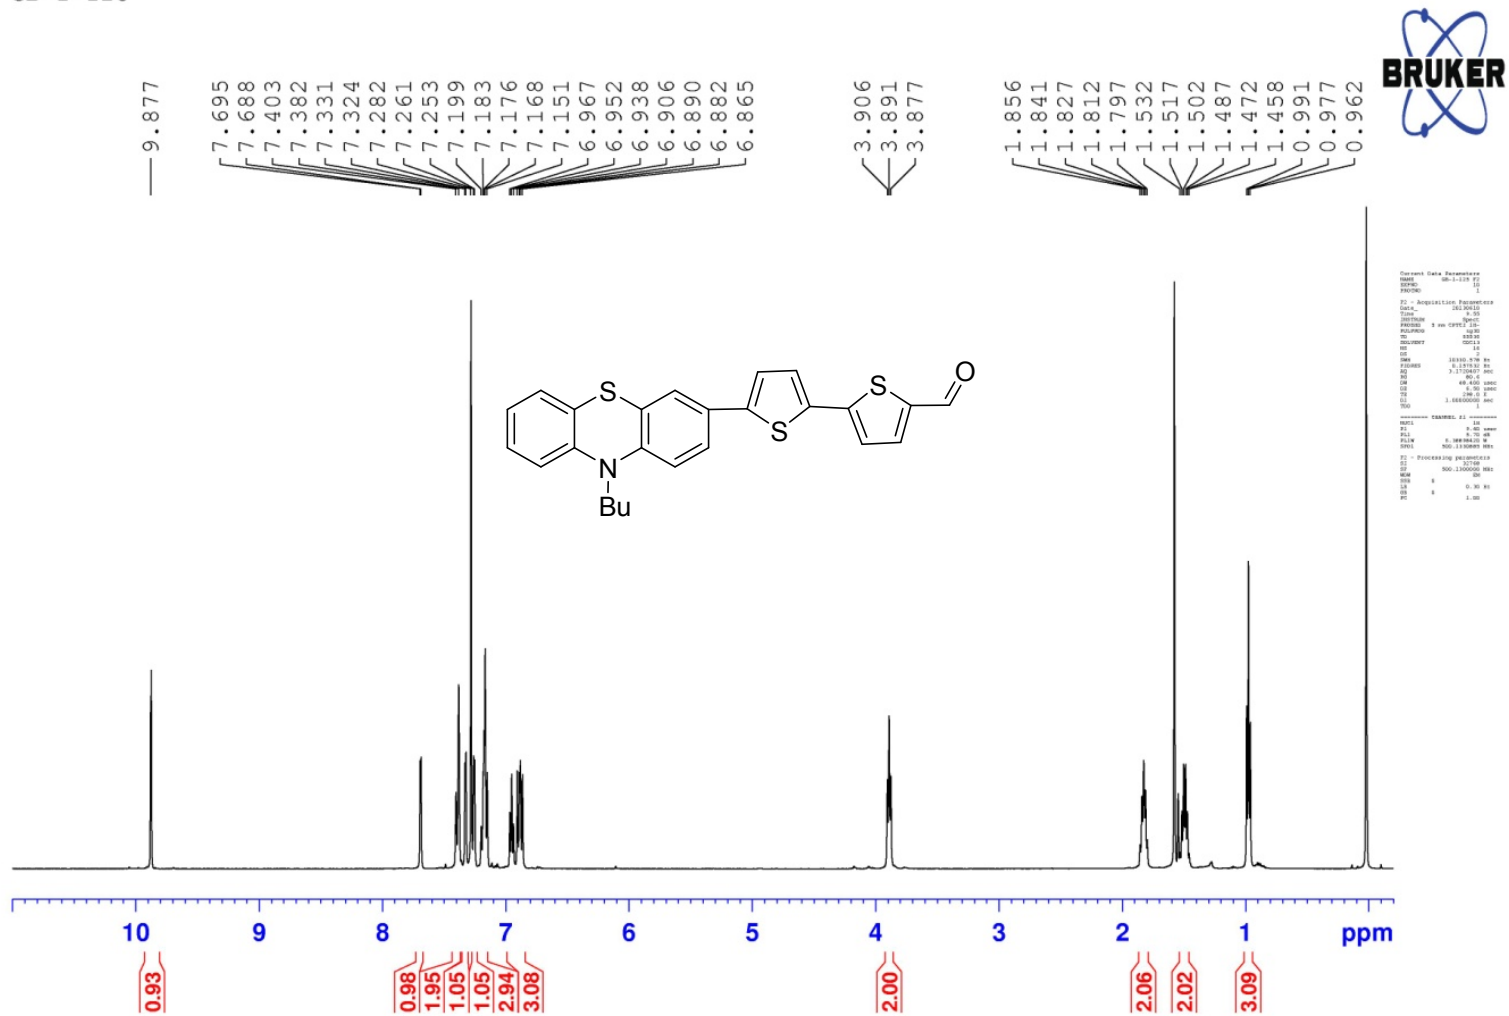

Fig. S21 <sup>1</sup>H NMR spectra of 10.



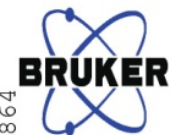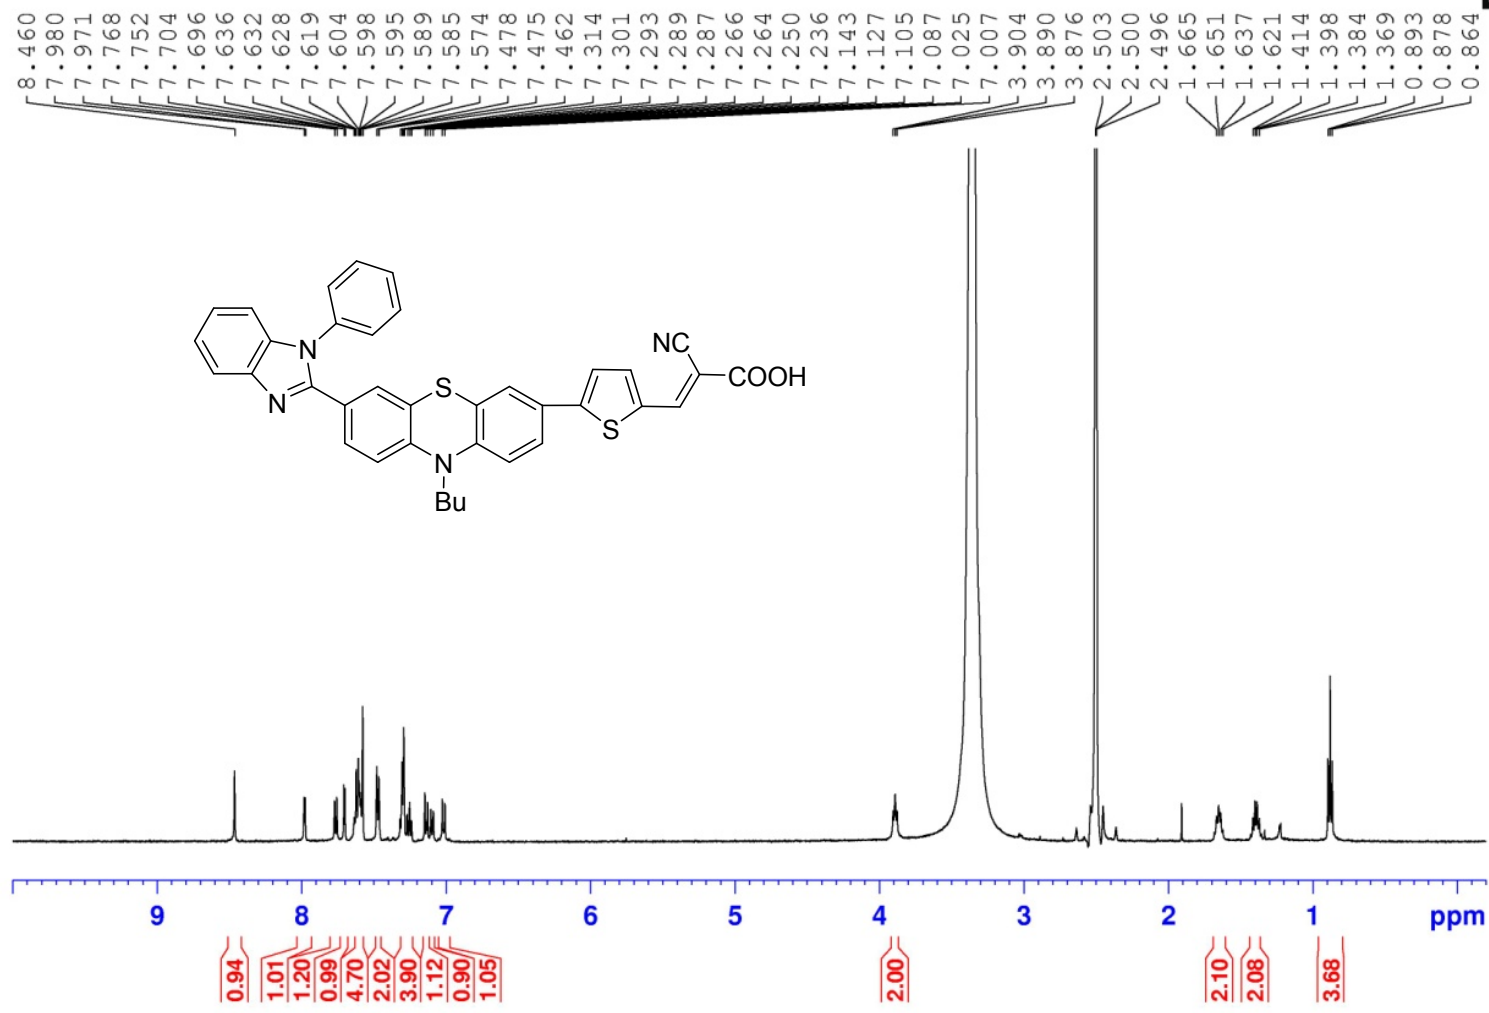

```

Current Data Parameters
NAME: GB-1-28
EXPNO: 1
PROCNO: 1
F2 - Acquisition Parameters
Date_: 20121221
Time: 13.28
INSTRUM: spect
PROBHD: 5 mm PABBO BB-
PULPROG: zgpg30
TD: 65536
AQ: 0.960
RG: 16
SOLVENT:
NS: 16
DS: 4
SWH: 10330.878 Hz
FIDRES: 0.157633 Hz
AQRES: 3.171249 Hz
RG: 218
SI: 32768
SF: 500.1308940 MHz
DE: 6.00 usec
TE: 299.8 K
D1: 1.0000000 sec
TD0: 1
----- CHANNEL f1 -----
NUC1: 1H
P1: 14.00 usec
PL1: 0.00 dB
SFO1: 500.1308940 MHz
F2 - Processing parameters
SI: 32768
SF: 500.1308940 MHz
WDW: EM
SSB: 0
LB: 0.30 Hz
GB: 0
PC: 1.00
    
```

Fig. S23 <sup>1</sup>H NMR spectra of GJ1.

GJ-1 C13

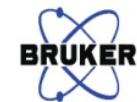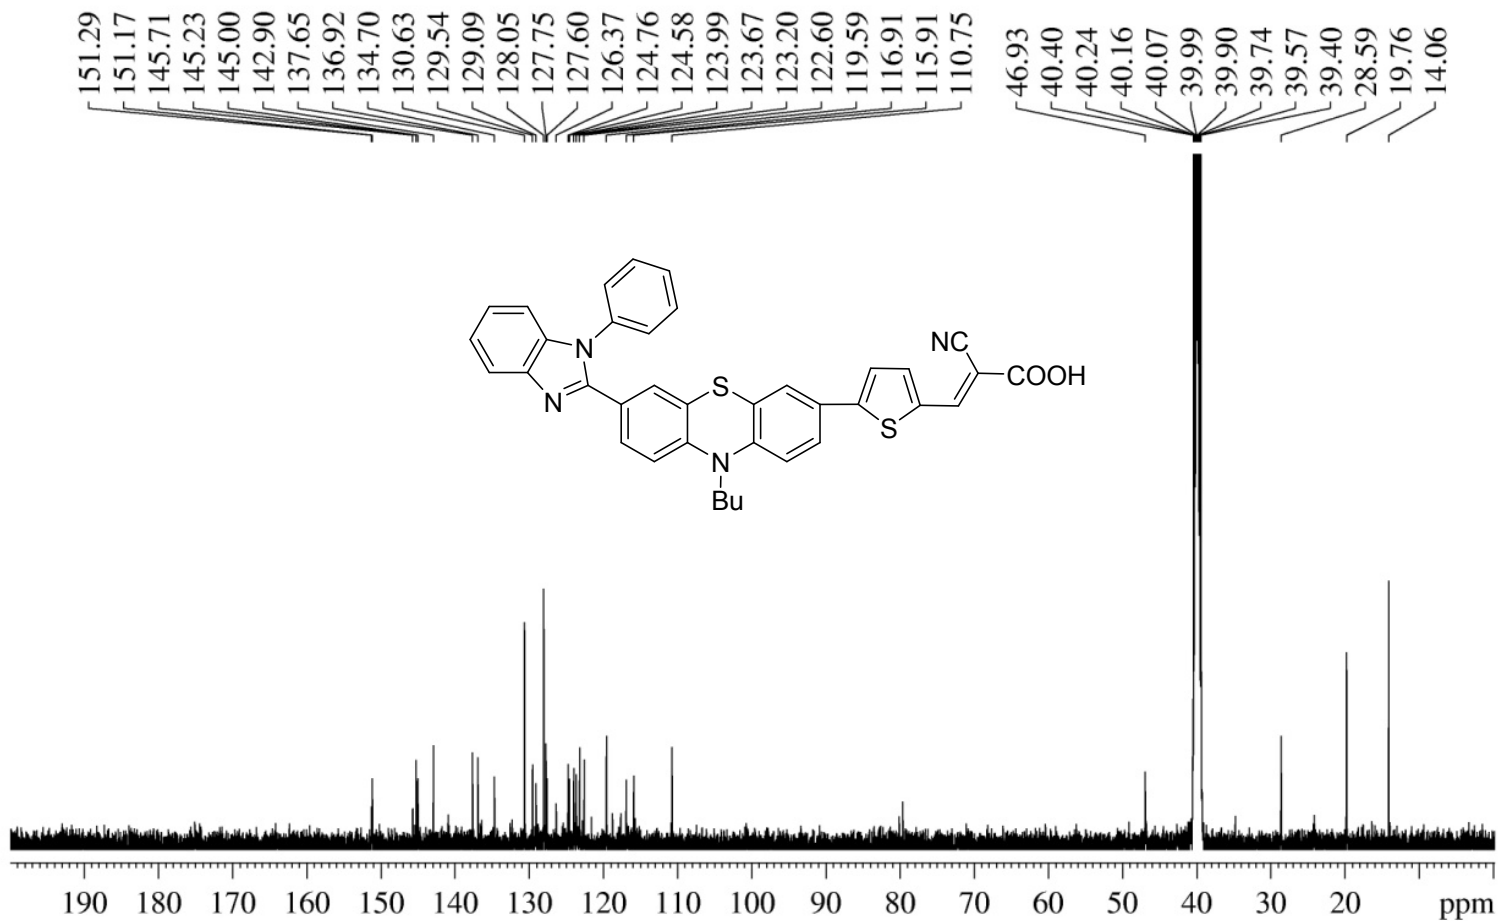

Fig. S24 <sup>13</sup>C NMR spectra of GJ1.

GB-1-70

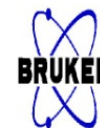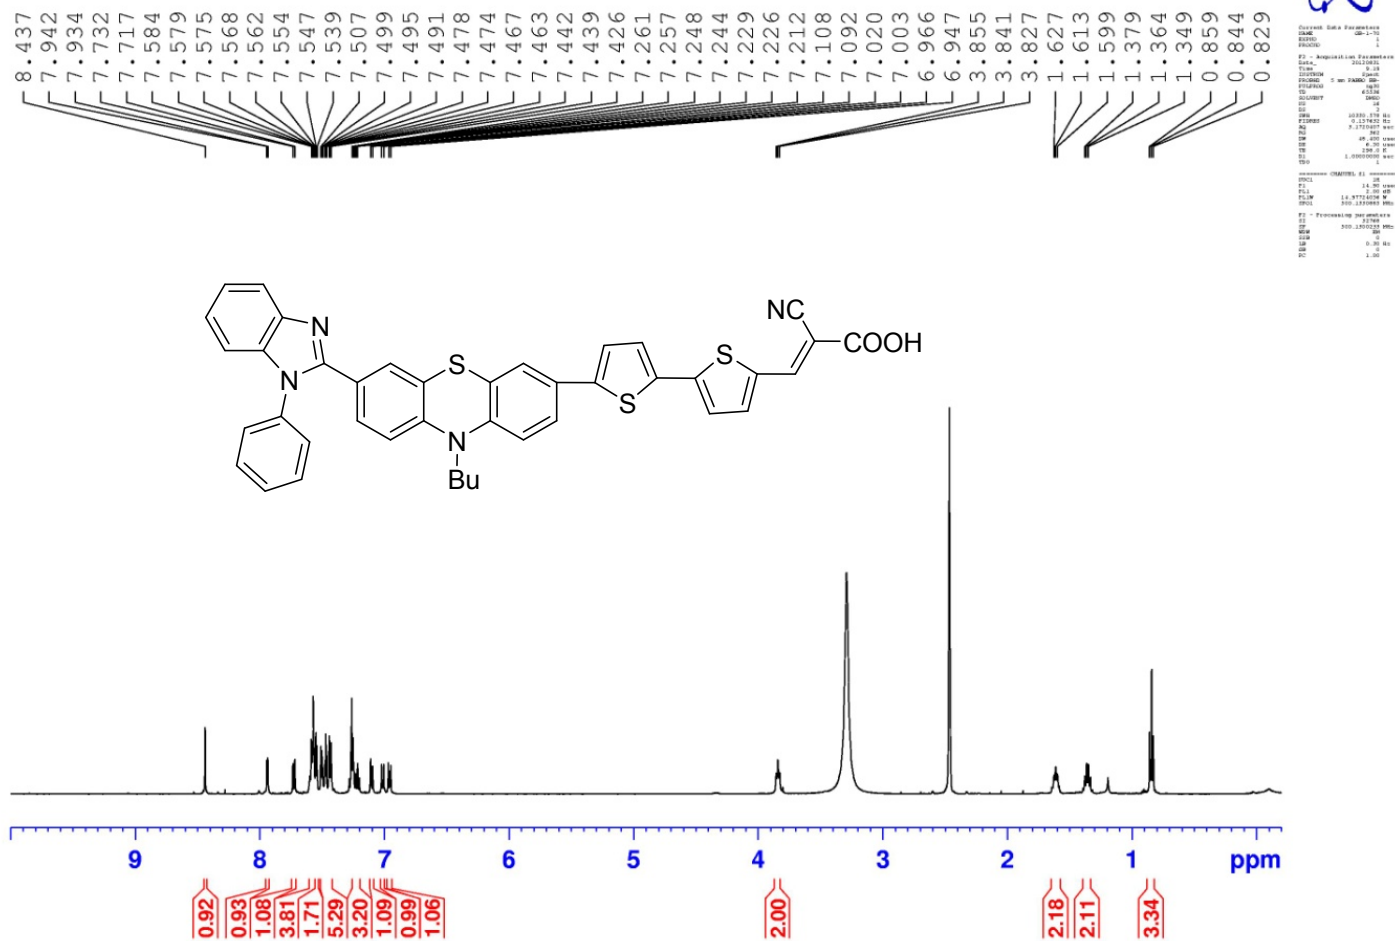

Fig. S25 <sup>1</sup>H NMR spectra of GJ2.

GJ-2 C13

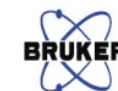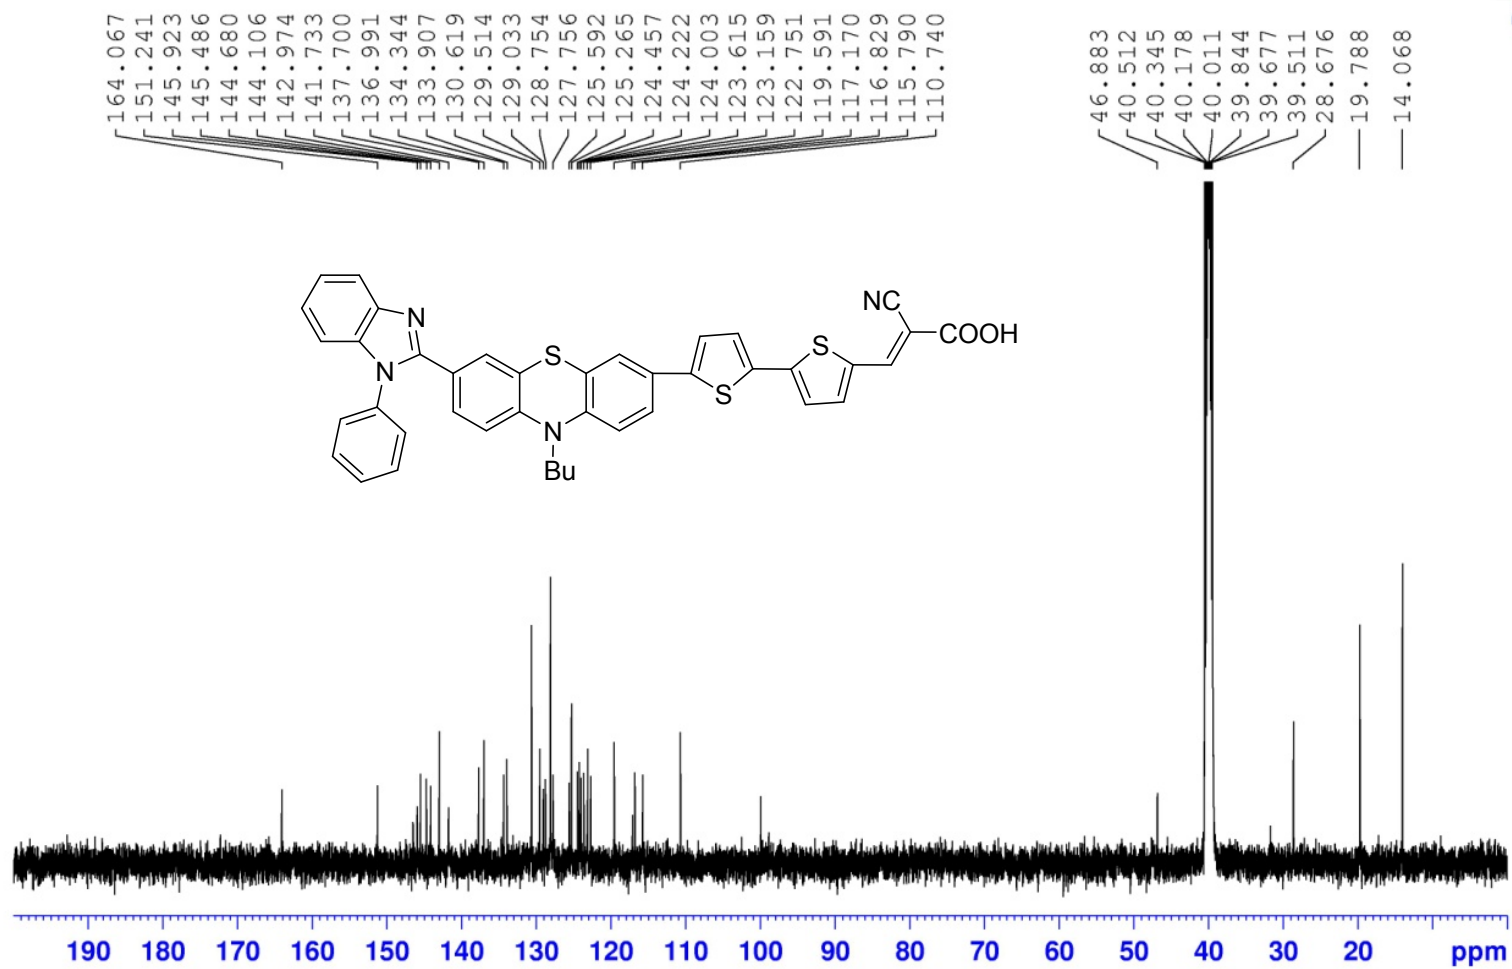

Fig. S26 <sup>13</sup>C NMR spectra of GJ2.



GB-1-71

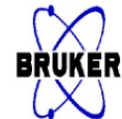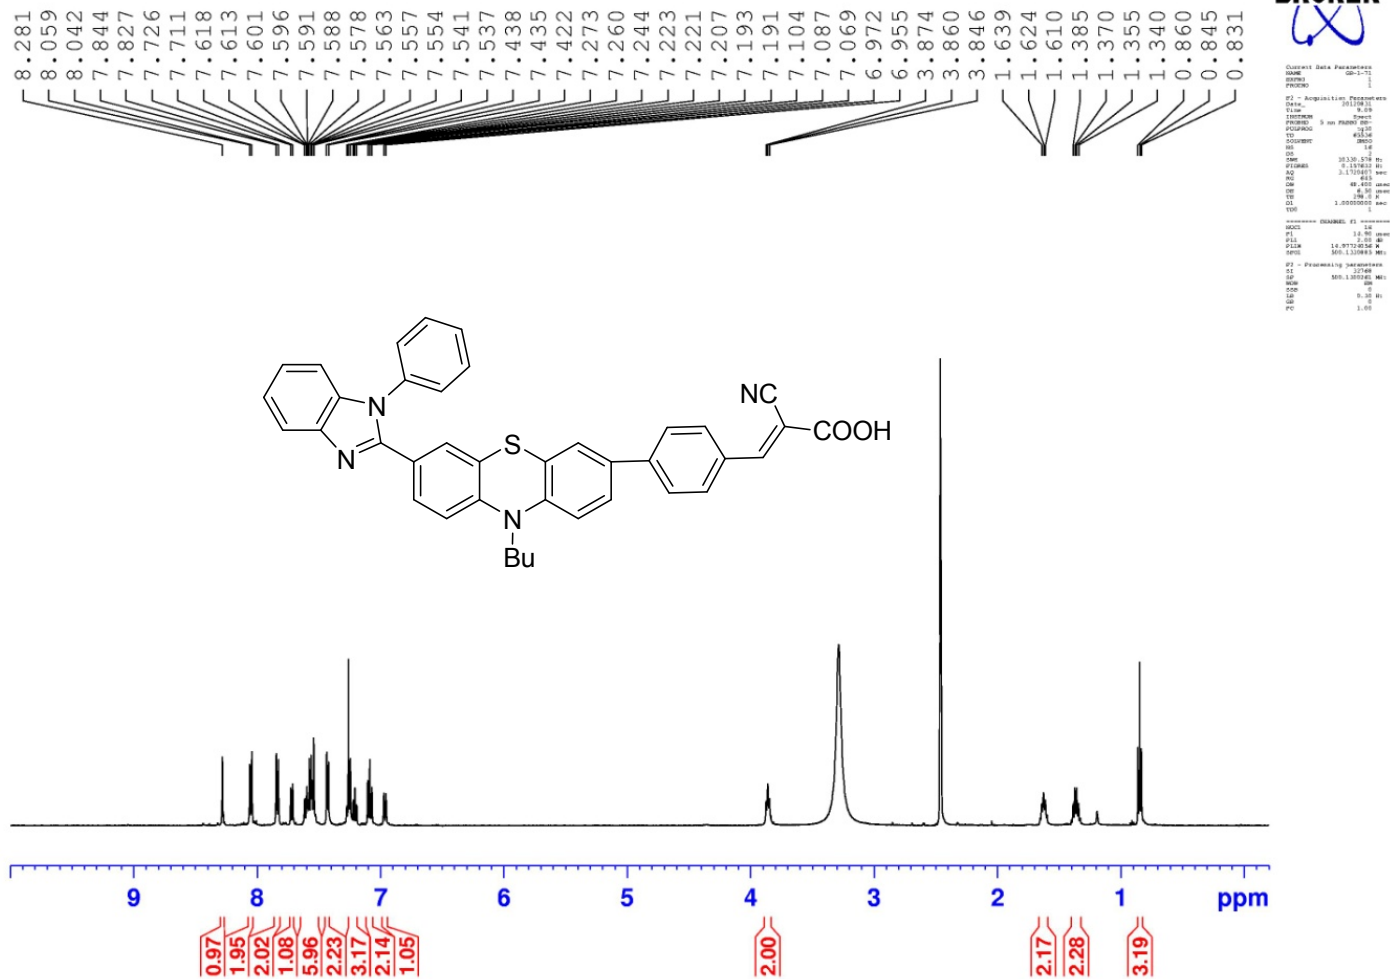

Fig. S27 <sup>1</sup>H NMR spectra of GJ3.

GJ-3 C13

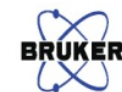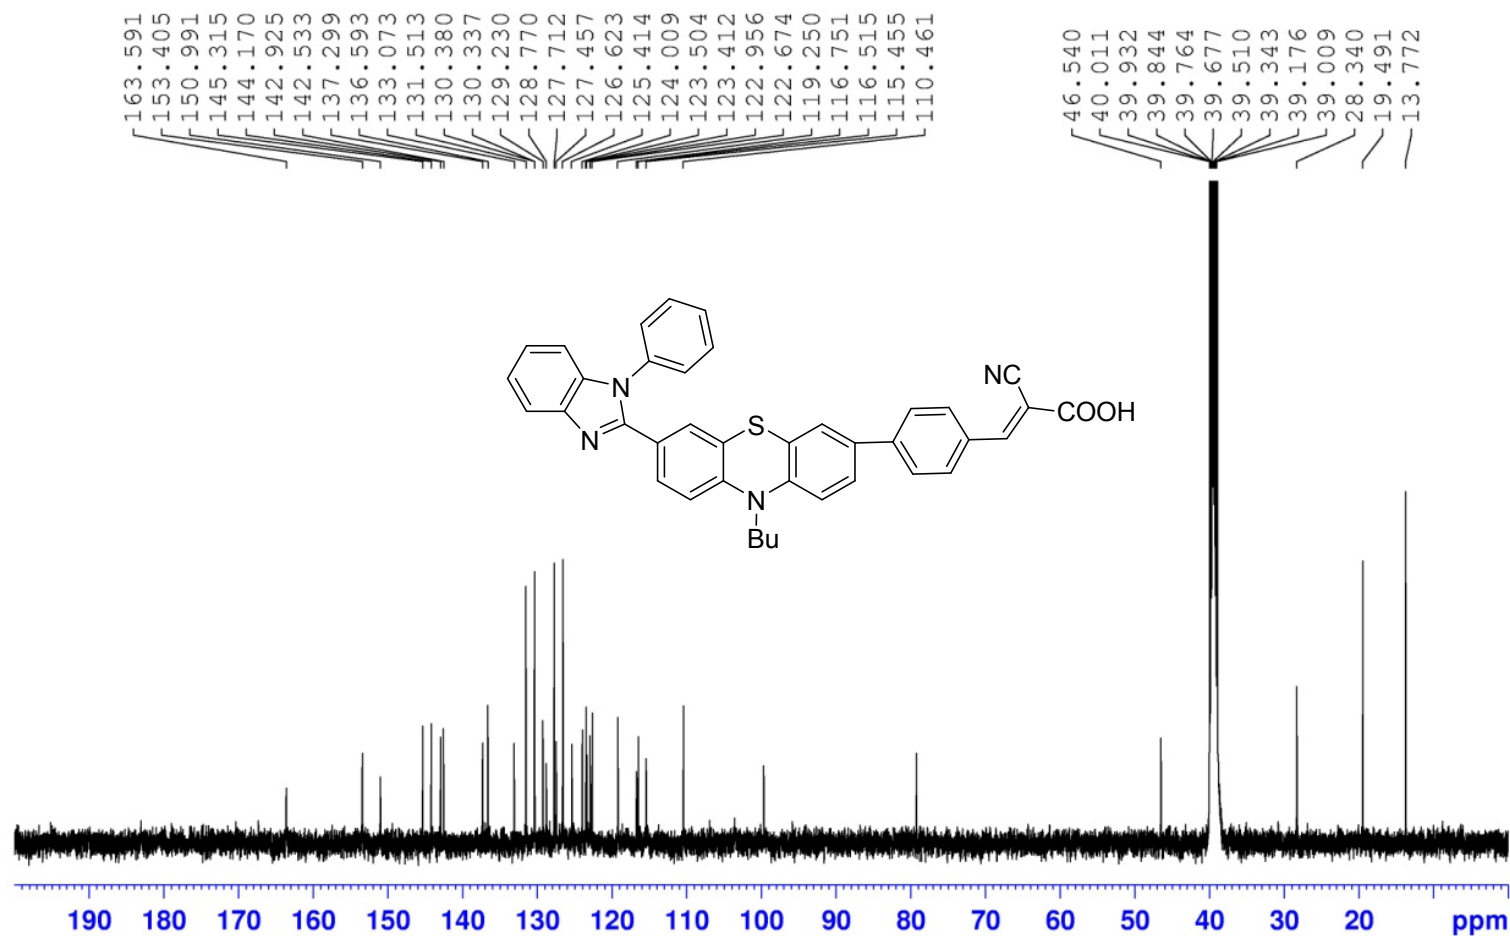

Fig. S28 <sup>13</sup>C NMR spectra of GJ3.

GB-1-121

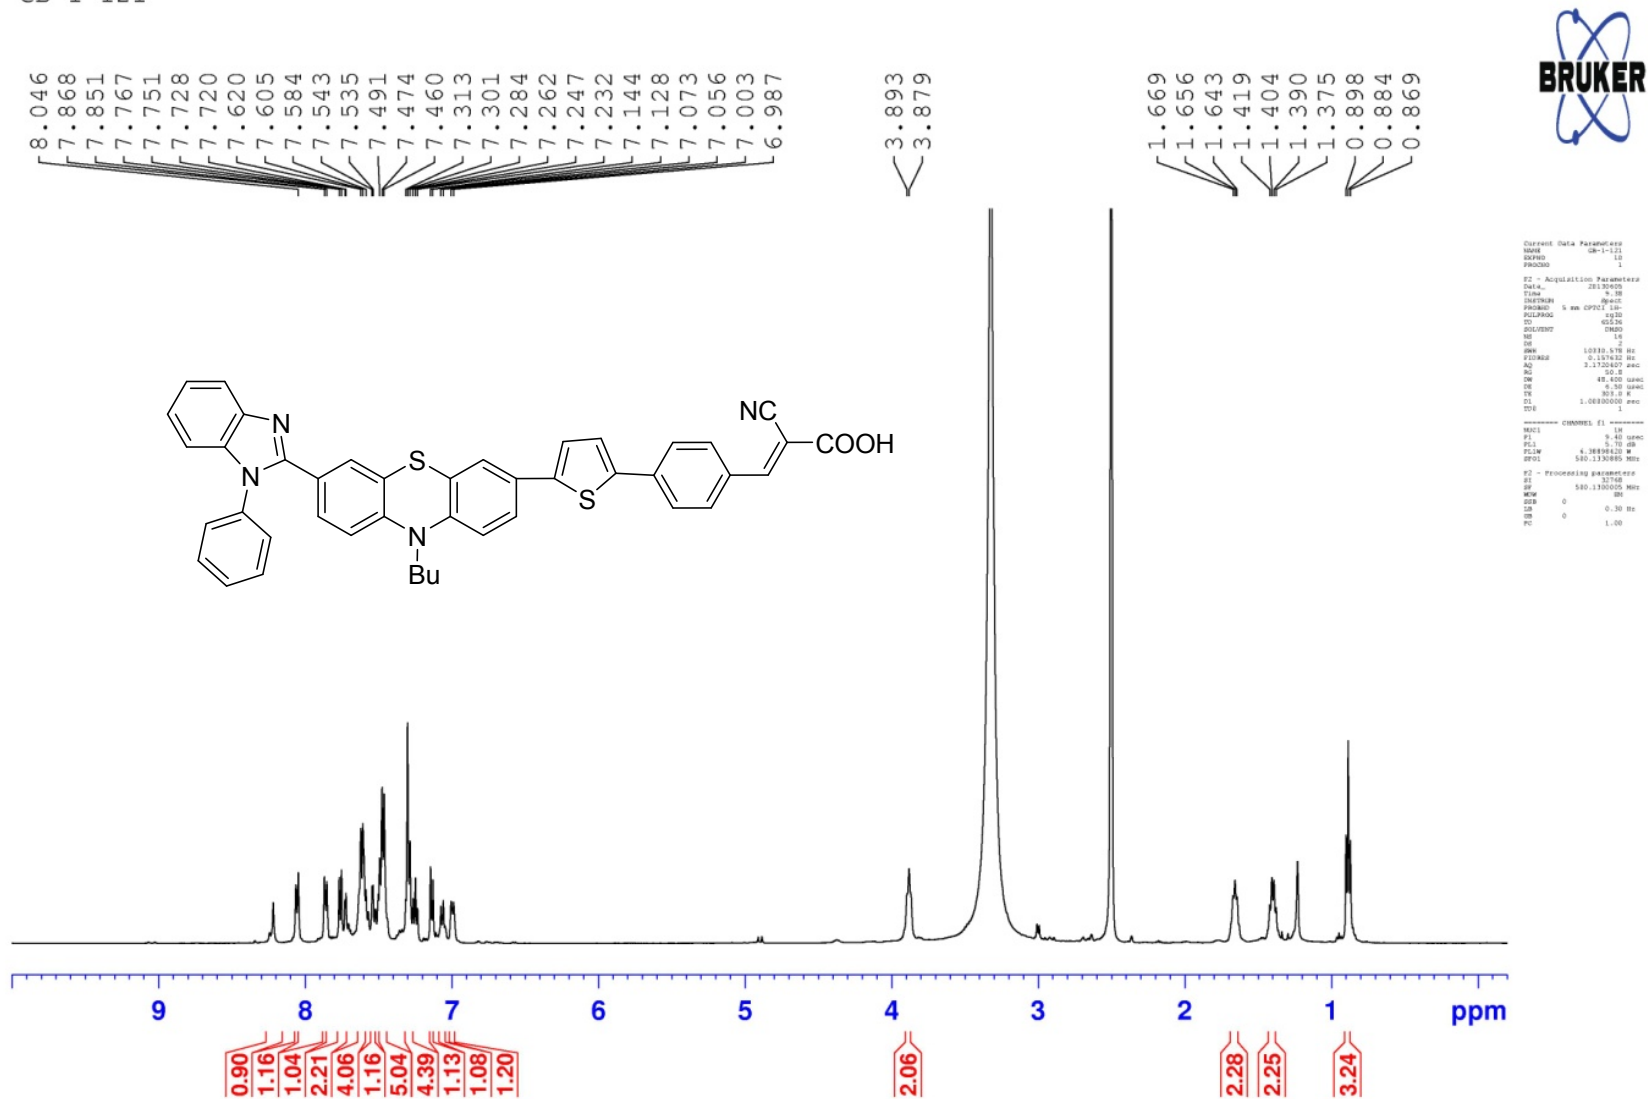

Fig. S29 <sup>1</sup>H NMR spectra of GJ4.

GJ-4 C13

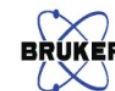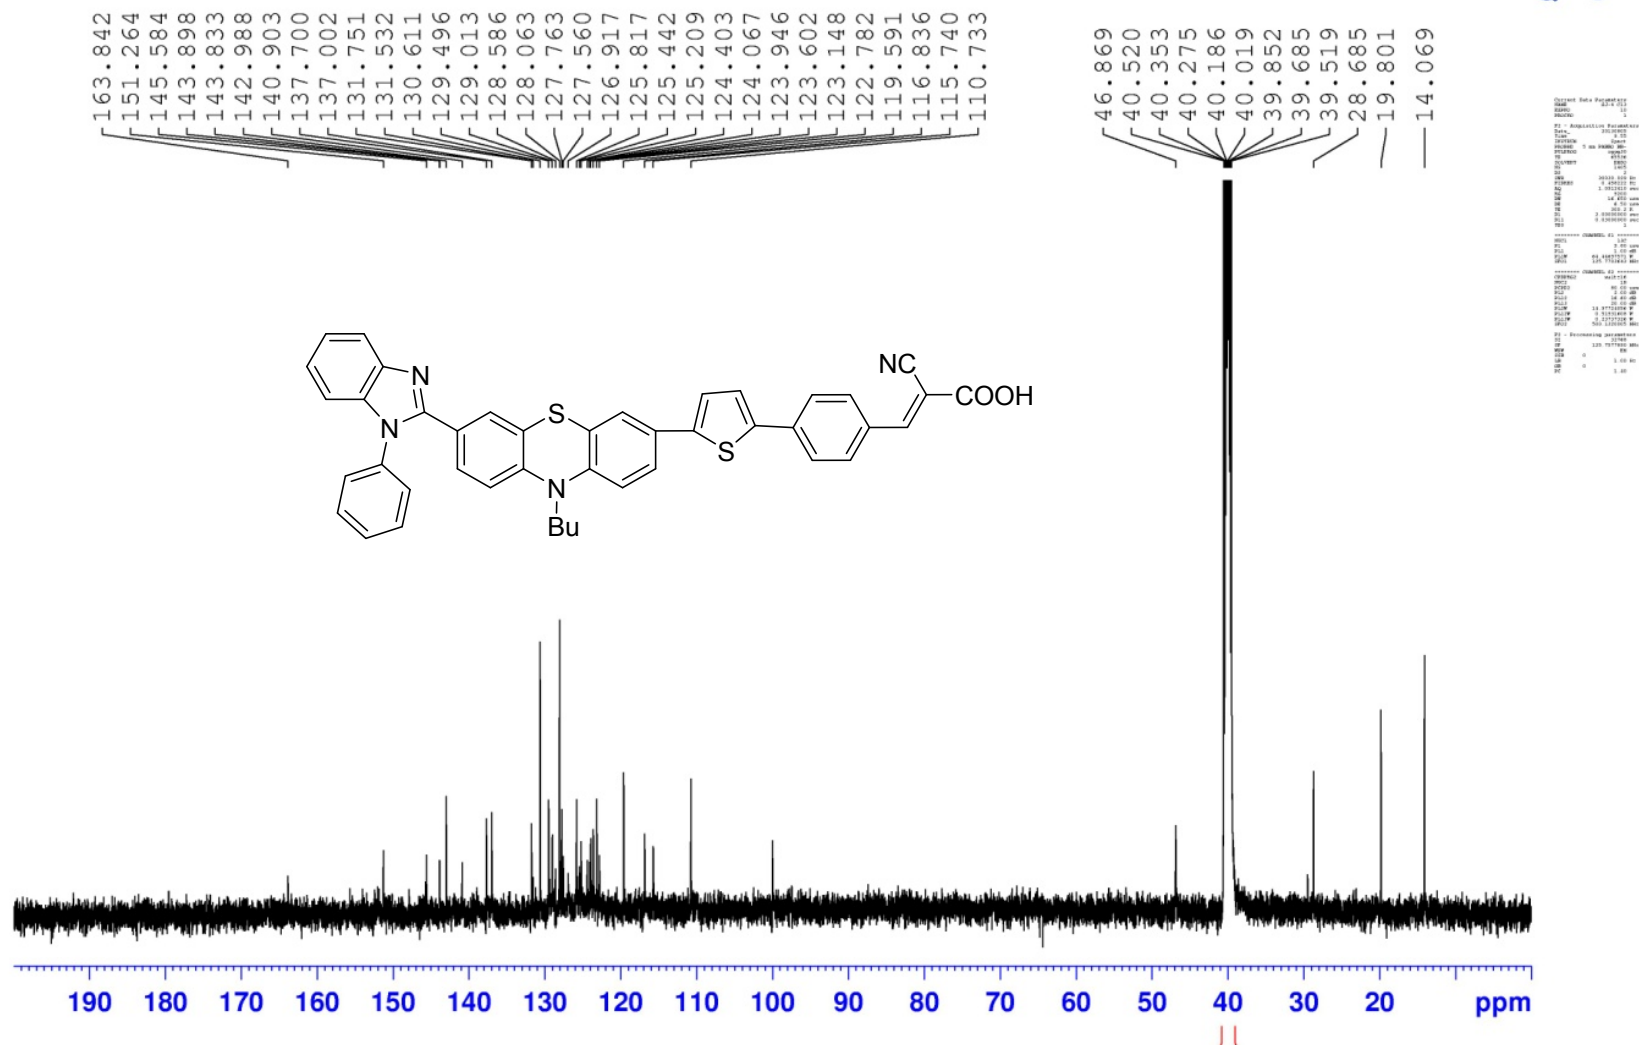

Fig. S30 <sup>13</sup>C NMR spectra of GJ4.

GB-1-128

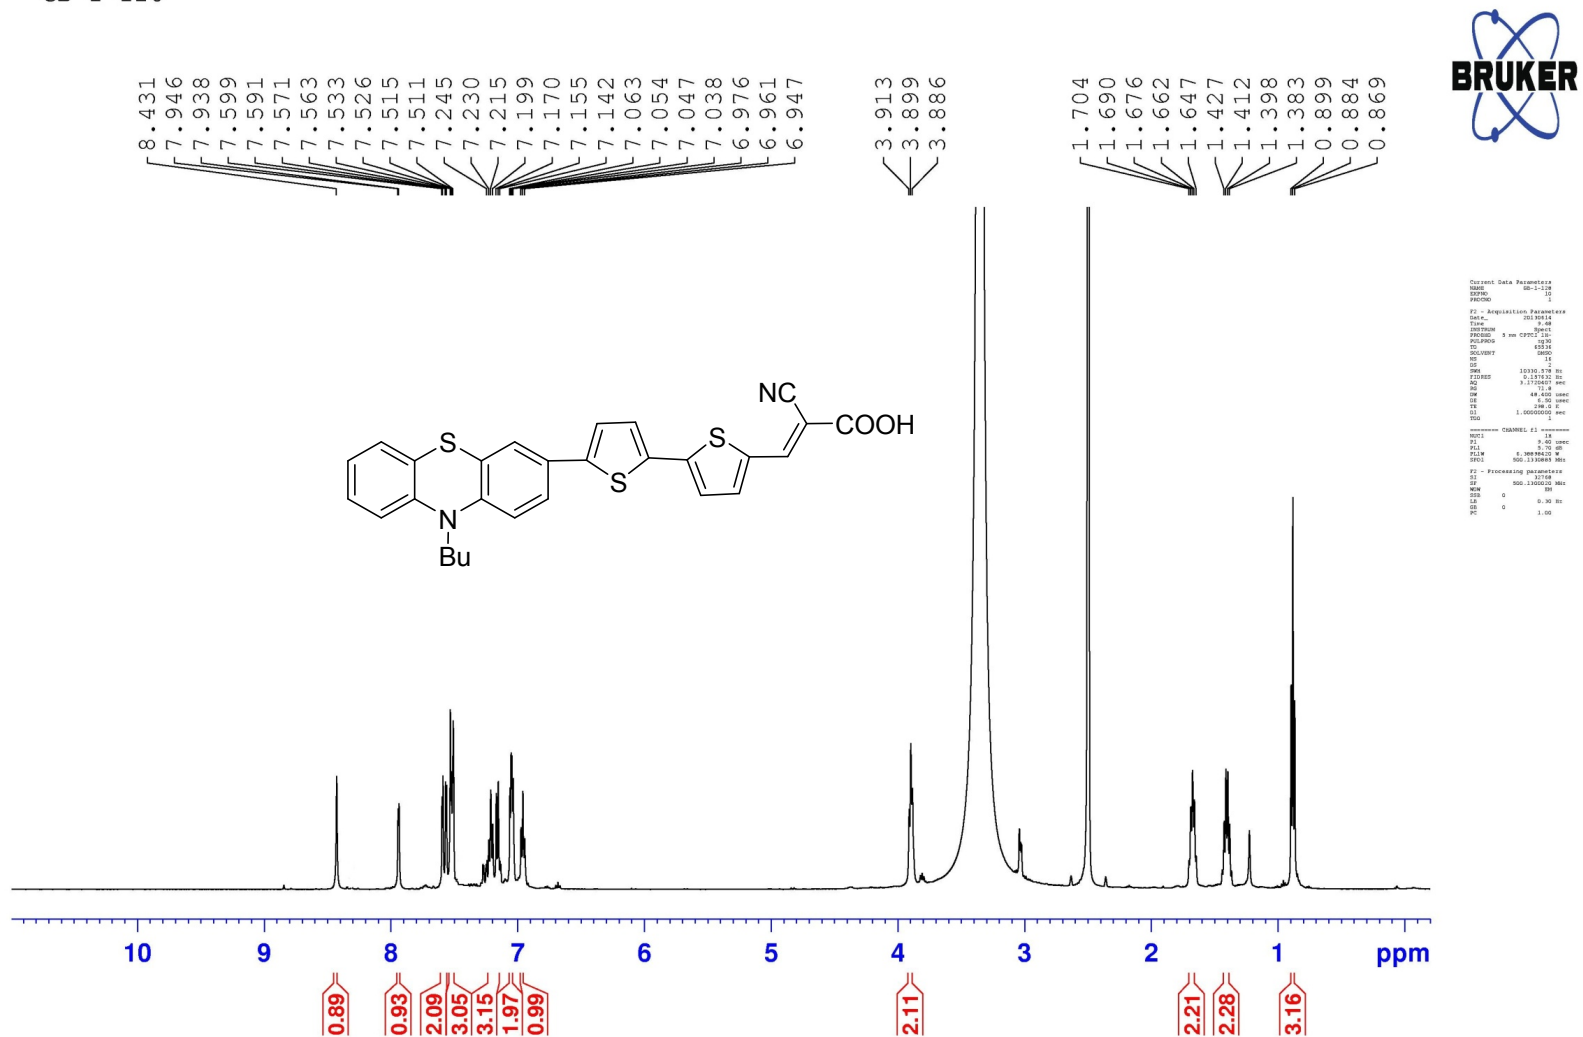

Fig. S31 <sup>1</sup>H NMR spectra of GJ5.

GJ-5-2 C13

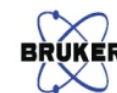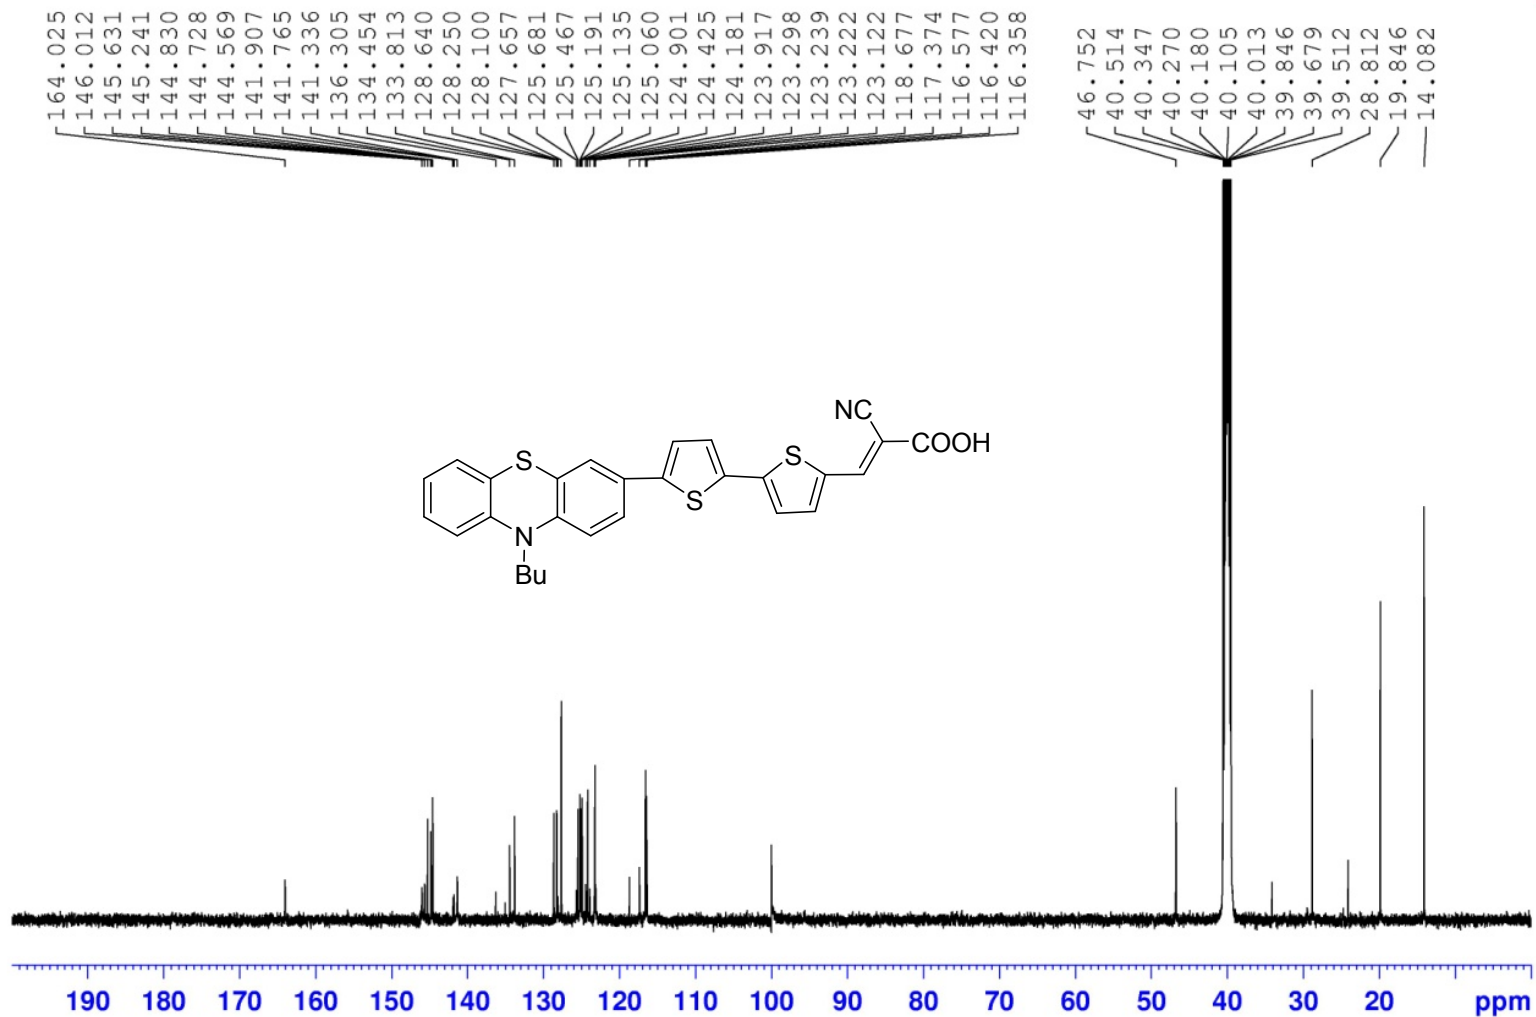

Fig. S32 <sup>13</sup>C NMR spectra of GJ5.

Table S1 Cartesian coordinates for the optimized structure of **GJ1**.

| At. No. | X         | Y         | Z         |
|---------|-----------|-----------|-----------|
| 6       | -3.556108 | -0.107283 | 0.167558  |
| 6       | -2.450337 | -0.602089 | 0.885706  |
| 6       | -1.226231 | 0.053696  | 0.867482  |
| 6       | -1.040989 | 1.225870  | 0.102061  |
| 6       | -2.134849 | 1.698078  | -0.643014 |
| 6       | -3.367134 | 1.056840  | -0.596366 |
| 6       | 1.380298  | 1.069012  | 0.047495  |
| 6       | 1.454942  | -0.116973 | 0.804942  |
| 6       | 2.579763  | -0.929924 | 0.752471  |
| 1       | 2.612616  | -1.854536 | 1.318401  |
| 6       | 3.695643  | -0.571241 | -0.024178 |
| 6       | 3.620233  | 0.603683  | -0.785554 |
| 6       | 2.477545  | 1.400085  | -0.760154 |
| 1       | -2.554805 | -1.491284 | 1.499345  |
| 1       | -2.022375 | 2.562984  | -1.286862 |
| 1       | -4.181052 | 1.447675  | -1.200137 |
| 1       | 4.438825  | 0.892657  | -1.433949 |
| 1       | 2.442920  | 2.284450  | -1.386385 |
| 16      | 0.106778  | -0.523517 | 1.899717  |
| 7       | 0.213283  | 1.868162  | 0.100123  |
| 6       | 4.840527  | -1.493715 | -0.040189 |
| 7       | 4.711285  | -2.782167 | 0.199374  |
| 7       | 6.160720  | -1.135647 | -0.339099 |
| 6       | 5.974654  | -3.322013 | 0.064700  |
| 6       | 6.904924  | -2.313770 | -0.273891 |
| 6       | 6.736044  | 0.164165  | -0.480793 |
| 6       | 6.404293  | -4.647460 | 0.215239  |
| 6       | 8.264860  | -2.576779 | -0.448969 |
| 6       | 7.376192  | 0.507947  | -1.676346 |
| 6       | 6.691030  | 1.074287  | 0.580674  |
| 1       | 5.692238  | -5.425826 | 0.471572  |
| 6       | 7.755289  | -4.920736 | 0.032489  |
| 6       | 8.671794  | -3.899766 | -0.291849 |
| 1       | 8.973243  | -1.791501 | -0.693426 |
| 1       | 7.399940  | -0.207504 | -2.492820 |
| 6       | 7.967246  | 1.765338  | -1.808532 |
| 6       | 7.272085  | 2.333515  | 0.435461  |
| 1       | 6.203757  | 0.789682  | 1.507828  |
| 1       | 8.116336  | -5.939446 | 0.143372  |
| 1       | 9.721205  | -4.149316 | -0.422027 |
| 1       | 8.464554  | 2.029588  | -2.737554 |
| 6       | 7.912782  | 2.681094  | -0.756137 |
| 1       | 7.233230  | 3.039931  | 1.259909  |
| 1       | 8.369925  | 3.660773  | -0.862734 |

|    |            |           |           |
|----|------------|-----------|-----------|
| 6  | 0.300232   | 3.292875  | -0.243181 |
| 1  | 0.591591   | 3.437904  | -1.295273 |
| 6  | 1.232756   | 4.078382  | 0.689836  |
| 6  | 1.273208   | 5.571024  | 0.335667  |
| 1  | 2.247594   | 3.665986  | 0.652856  |
| 1  | 0.880151   | 3.945404  | 1.720689  |
| 6  | 2.183763   | 6.377427  | 1.267186  |
| 1  | 1.613939   | 5.691956  | -0.702651 |
| 1  | 0.255335   | 5.984433  | 0.372168  |
| 1  | 1.847480   | 6.306395  | 2.308451  |
| 1  | 3.216539   | 6.010478  | 1.226746  |
| 1  | -0.704662  | 3.705823  | -0.138911 |
| 6  | -4.838926  | -0.805234 | 0.212660  |
| 6  | -5.078867  | -2.132014 | 0.543301  |
| 16 | -6.329717  | 0.018998  | -0.172350 |
| 6  | -6.436417  | -2.483494 | 0.476562  |
| 1  | -4.289763  | -2.831843 | 0.792476  |
| 6  | -7.275174  | -1.440422 | 0.093331  |
| 1  | -6.815498  | -3.478706 | 0.686301  |
| 6  | -8.687040  | -1.573518 | -0.049455 |
| 6  | -9.640908  | -0.666065 | -0.429176 |
| 1  | -9.058679  | -2.567682 | 0.184490  |
| 6  | -9.335340  | 0.684356  | -0.775414 |
| 6  | -11.074884 | -1.029990 | -0.510357 |
| 7  | -9.058069  | 1.780729  | -1.053439 |
| 8  | -11.962021 | -0.272084 | -0.842135 |
| 8  | -11.312789 | -2.326500 | -0.169962 |
| 1  | -12.276024 | -2.443872 | -0.260871 |
| 1  | 2.195006   | 7.437726  | 0.991613  |



Table S2 Cartesian coordinates for the optimized structure of **GJ2**.

| At. No. | X         | Y         | Z         |
|---------|-----------|-----------|-----------|
| 6       | -1.891064 | 0.831038  | -0.052995 |
| 6       | -0.896368 | 0.158027  | 0.681824  |
| 6       | 0.416557  | 0.612712  | 0.703656  |
| 6       | 0.802722  | 1.753897  | -0.031208 |
| 6       | -0.181099 | 2.399450  | -0.797571 |
| 6       | -1.500041 | 1.957998  | -0.793977 |
| 6       | 3.174192  | 1.234287  | -0.024492 |
| 6       | 3.043891  | 0.034488  | 0.703960  |
| 6       | 4.035925  | -0.936919 | 0.666050  |
| 1       | 3.910862  | -1.867091 | 1.209655  |
| 6       | 5.220360  | -0.732433 | -0.063489 |
| 6       | 5.347708  | 0.455426  | -0.797349 |
| 6       | 4.335727  | 1.412719  | -0.789745 |
| 1       | -1.157434 | -0.711495 | 1.276888  |
| 1       | 0.084430  | 3.244159  | -1.423392 |
| 1       | -2.226344 | 2.476827  | -1.413181 |
| 1       | 6.223694  | 0.631190  | -1.410447 |
| 1       | 4.454763  | 2.303986  | -1.395739 |
| 16      | 1.616790  | -0.186564 | 1.751055  |
| 7       | 2.140904  | 2.199206  | 0.018730  |
| 6       | 6.219121  | -1.811534 | -0.061871 |
| 7       | 5.896504  | -3.073514 | 0.130783  |
| 7       | 7.589560  | -1.639304 | -0.292846 |
| 6       | 7.075361  | -3.785797 | 0.033634  |
| 6       | 8.154591  | -2.913385 | -0.232295 |
| 6       | 8.349644  | -0.432247 | -0.363357 |
| 6       | 7.305025  | -5.162538 | 0.160966  |
| 6       | 9.470129  | -3.363848 | -0.355312 |
| 6       | 9.098895  | -0.154936 | -1.511859 |
| 6       | 8.373436  | 0.449739  | 0.722304  |
| 1       | 6.478299  | -5.837025 | 0.361416  |
| 6       | 8.610755  | -5.621875 | 0.029051  |
| 6       | 9.677422  | -4.735026 | -0.222094 |
| 1       | 10.293896 | -2.682280 | -0.542839 |
| 1       | 9.068424  | -0.847017 | -2.348004 |
| 6       | 9.867603  | 1.008434  | -1.573087 |
| 6       | 9.133010  | 1.616638  | 0.647542  |
| 1       | 7.798859  | 0.215771  | 1.612879  |
| 1       | 8.817653  | -6.684260 | 0.123690  |
| 1       | 10.685921 | -5.128808 | -0.313456 |
| 1       | 10.449411 | 1.220718  | -2.465676 |
| 6       | 9.882596  | 1.897838  | -0.497141 |
| 1       | 9.147249  | 2.301579  | 1.490704  |
| 1       | 10.478587 | 2.804638  | -0.548590 |

|    |            |           |           |
|----|------------|-----------|-----------|
| 6  | 2.448594   | 3.600834  | -0.287357 |
| 1  | 2.781065   | 3.724915  | -1.330126 |
| 6  | 3.467584   | 4.218631  | 0.680571  |
| 6  | 3.720551   | 5.701474  | 0.376738  |
| 1  | 4.415371   | 3.669978  | 0.639721  |
| 1  | 3.084989   | 4.103623  | 1.702813  |
| 6  | 4.728673   | 6.340956  | 1.336899  |
| 1  | 4.082268   | 5.807699  | -0.656116 |
| 1  | 2.770518   | 6.252446  | 0.424853  |
| 1  | 4.380499   | 6.279278  | 2.374862  |
| 1  | 5.701284   | 5.836966  | 1.283315  |
| 1  | 1.513964   | 4.156747  | -0.191191 |
| 6  | -3.271007  | 0.347438  | -0.042482 |
| 6  | -3.737412  | -0.926638 | 0.219104  |
| 16 | -4.613978  | 1.424413  | -0.370971 |
| 6  | -5.142928  | -1.048652 | 0.144442  |
| 1  | -3.079150  | -1.762910 | 0.425482  |
| 6  | -5.788218  | 0.131866  | -0.176335 |
| 1  | -5.669609  | -1.984494 | 0.300475  |
| 1  | 4.887389   | 7.398864  | 1.100151  |
| 6  | -7.197067  | 0.376692  | -0.344342 |
| 6  | -7.821880  | 1.530225  | -0.806970 |
| 16 | -8.373158  | -0.854965 | 0.056671  |
| 6  | -9.218945  | 1.422980  | -0.844549 |
| 1  | -7.275660  | 2.414233  | -1.116736 |
| 6  | -9.708748  | 0.191631  | -0.415208 |
| 1  | -9.877863  | 2.216976  | -1.181055 |
| 6  | -11.093798 | -0.136148 | -0.374140 |
| 6  | -11.733611 | -1.285791 | 0.011504  |
| 1  | -11.744122 | 0.668758  | -0.706317 |
| 6  | -11.039062 | -2.442895 | 0.474823  |
| 6  | -13.209283 | -1.407298 | -0.026990 |
| 7  | -10.445837 | -3.372677 | 0.849075  |
| 8  | -13.829970 | -2.396734 | 0.300753  |
| 8  | -13.822833 | -0.277403 | -0.475498 |
| 1  | -14.776414 | -0.477744 | -0.455471 |

Table S3 Cartesian coordinates for the optimized structure of **GJ3**.

| At. No. | X         | Y         | Z         |
|---------|-----------|-----------|-----------|
| 6       | -3.516112 | 1.165307  | -0.158737 |
| 6       | -2.552480 | 0.475165  | 0.597401  |
| 6       | -1.225481 | 0.890368  | 0.631971  |
| 6       | -0.792113 | 1.997664  | -0.126664 |
| 6       | -1.744380 | 2.656336  | -0.921512 |
| 6       | -3.079062 | 2.262552  | -0.917023 |
| 6       | 1.558992  | 1.393695  | -0.078857 |
| 6       | 1.378236  | 0.220365  | 0.681255  |
| 6       | 2.334101  | -0.787178 | 0.680548  |
| 1       | 2.169538  | -1.696632 | 1.248087  |
| 6       | 3.532106  | -0.647006 | -0.042233 |
| 6       | 3.709856  | 0.514481  | -0.807041 |
| 6       | 2.733645  | 1.508036  | -0.836228 |
| 1       | -2.846686 | -0.373745 | 1.207103  |
| 1       | -1.442306 | 3.472400  | -1.568583 |
| 1       | -3.780567 | 2.788288  | -1.557895 |
| 1       | 4.597270  | 0.641643  | -1.415645 |
| 1       | 2.891916  | 2.377466  | -1.464546 |
| 16      | -0.066982 | 0.080309  | 1.717199  |
| 7       | 0.561024  | 2.396659  | -0.072787 |
| 6       | 4.488766  | -1.762819 | -0.000110 |
| 7       | 4.115901  | -3.004260 | 0.231098  |
| 7       | 5.866348  | -1.652106 | -0.227001 |
| 6       | 5.266226  | -3.764833 | 0.165883  |
| 6       | 6.380589  | -2.944604 | -0.120418 |
| 6       | 6.673397  | -0.478569 | -0.333489 |
| 6       | 5.440347  | -5.144414 | 0.340607  |
| 6       | 7.678172  | -3.450333 | -0.217881 |
| 6       | 7.433615  | -0.266348 | -1.488606 |
| 6       | 6.730320  | 0.435406  | 0.724068  |
| 1       | 4.586263  | -5.778717 | 0.556879  |
| 6       | 6.727786  | -5.658829 | 0.234558  |
| 6       | 7.830233  | -4.823360 | -0.037397 |
| 1       | 8.529532  | -2.808305 | -0.421096 |
| 1       | 7.377262  | -0.982580 | -2.302751 |
| 6       | 8.245937  | 0.864544  | -1.584763 |
| 6       | 7.533879  | 1.569633  | 0.614439  |
| 1       | 6.146154  | 0.251555  | 1.620142  |
| 1       | 6.891957  | -6.724724 | 0.366221  |
| 1       | 8.823029  | -5.259193 | -0.107463 |
| 1       | 8.835978  | 1.026467  | -2.482500 |
| 6       | 8.294163  | 1.786166  | -0.537235 |
| 1       | 7.573508  | 2.279601  | 1.435803  |

|   |            |           |           |
|---|------------|-----------|-----------|
| 1 | 8.924150   | 2.667651  | -0.616209 |
| 6 | 0.923683   | 3.774602  | -0.422294 |
| 1 | 1.275345   | 3.849550  | -1.463464 |
| 6 | 1.951099   | 4.387802  | 0.539733  |
| 6 | 2.290943   | 5.837522  | 0.168858  |
| 1 | 2.868718   | 3.788752  | 0.551348  |
| 1 | 1.539098   | 4.345226  | 1.556136  |
| 6 | 3.299152   | 6.475781  | 1.129776  |
| 1 | 2.691856   | 5.868945  | -0.854450 |
| 1 | 1.370378   | 6.438352  | 0.153585  |
| 1 | 2.911846   | 6.493406  | 2.155494  |
| 1 | 4.242834   | 5.917072  | 1.141808  |
| 1 | 0.009346   | 4.367698  | -0.360352 |
| 1 | 3.525797   | 7.507988  | 0.840590  |
| 6 | -4.931962  | 0.740493  | -0.164364 |
| 6 | -5.971897  | 1.681871  | -0.281449 |
| 6 | -5.290101  | -0.618298 | -0.055068 |
| 6 | -7.298496  | 1.279766  | -0.289631 |
| 1 | -5.734661  | 2.739917  | -0.336708 |
| 6 | -6.615628  | -1.025891 | -0.060360 |
| 1 | -4.511275  | -1.372244 | 0.005942  |
| 6 | -7.659341  | -0.081279 | -0.178820 |
| 1 | -8.082587  | 2.028666  | -0.371400 |
| 1 | -6.838996  | -2.082407 | 0.017338  |
| 6 | -9.077545  | -0.388361 | -0.196304 |
| 6 | -9.756065  | -1.570392 | -0.118413 |
| 1 | -9.718117  | 0.484420  | -0.289219 |
| 6 | -9.138254  | -2.853956 | 0.007342  |
| 6 | -11.242899 | -1.615142 | -0.160101 |
| 7 | -8.623404  | -3.892664 | 0.109715  |
| 8 | -11.899497 | -2.632203 | -0.095944 |
| 8 | -11.810787 | -0.385885 | -0.279138 |
| 1 | -12.772229 | -0.545806 | -0.294559 |

Table S4 Cartesian coordinates for the optimized structure of **GJ4**.

| At. No. | X         | Y         | Z         |
|---------|-----------|-----------|-----------|
| 6       | -1.824137 | 0.436139  | 0.087079  |
| 6       | -0.773788 | -0.165598 | 0.805300  |
| 6       | 0.505975  | 0.376128  | 0.802076  |
| 6       | 0.801665  | 1.537738  | 0.057806  |
| 6       | -0.237585 | 2.115424  | -0.688823 |
| 6       | -1.524045 | 1.586210  | -0.660240 |
| 6       | 3.200497  | 1.169038  | 0.012800  |
| 6       | 3.163136  | -0.033695 | 0.747136  |
| 6       | 4.213081  | -0.941062 | 0.687773  |
| 1       | 4.159857  | -1.874847 | 1.236951  |
| 6       | 5.364374  | -0.666083 | -0.071140 |
| 6       | 5.399251  | 0.524302  | -0.811139 |
| 6       | 4.329945  | 1.416565  | -0.780849 |
| 1       | -0.965503 | -1.049314 | 1.405914  |
| 1       | -0.040985 | 2.975229  | -1.319532 |
| 1       | -2.295735 | 2.054015  | -1.264979 |
| 1       | 6.247031  | 0.751988  | -1.446368 |
| 1       | 4.378568  | 2.311194  | -1.391580 |
| 16      | 1.776696  | -0.339659 | 1.826759  |
| 7       | 2.110408  | 2.067603  | 0.078735  |
| 6       | 6.429025  | -1.679945 | -0.090260 |
| 7       | 6.192556  | -2.958354 | 0.119048  |
| 7       | 7.779173  | -1.423464 | -0.359687 |
| 6       | 7.411081  | -3.595488 | -0.006214 |
| 6       | 8.425160  | -2.658788 | -0.307592 |
| 6       | 8.460329  | -0.172137 | -0.459930 |
| 6       | 7.731193  | -4.953829 | 0.123531  |
| 6       | 9.762703  | -3.025919 | -0.464886 |
| 6       | 9.156294  | 0.141722  | -1.632318 |
| 6       | 8.463068  | 0.717613  | 0.619634  |
| 1       | 6.954890  | -5.677735 | 0.351345  |
| 6       | 9.059427  | -5.330502 | -0.041789 |
| 6       | 10.060264 | -4.380066 | -0.328701 |
| 1       | 10.535656 | -2.294897 | -0.680228 |
| 1       | 9.142741  | -0.557162 | -2.463256 |
| 6       | 9.850970  | 1.348846  | -1.723406 |
| 6       | 9.148162  | 1.927627  | 0.515376  |
| 1       | 7.931100  | 0.455792  | 1.528744  |
| 1       | 9.336071  | -6.376819 | 0.053854  |
| 1       | 11.088768 | -4.710135 | -0.445903 |
| 1       | 10.391561 | 1.589477  | -2.634519 |
| 6       | 9.844753  | 2.245119  | -0.653058 |
| 1       | 9.146347  | 2.618332  | 1.353945  |
| 1       | 10.383067 | 3.185774  | -0.727435 |

|    |            |           |           |
|----|------------|-----------|-----------|
| 6  | 2.323281   | 3.484226  | -0.237937 |
| 1  | 2.626786   | 3.624354  | -1.287647 |
| 6  | 3.321328   | 4.167825  | 0.707370  |
| 6  | 3.483548   | 5.660237  | 0.389445  |
| 1  | 4.298408   | 3.674256  | 0.653281  |
| 1  | 2.964136   | 4.038714  | 1.737096  |
| 6  | 4.470125   | 6.363565  | 1.327105  |
| 1  | 3.820494   | 5.778979  | -0.650398 |
| 1  | 2.504667   | 6.156814  | 0.450819  |
| 1  | 4.144007   | 6.290744  | 2.371500  |
| 1  | 5.468782   | 5.915156  | 1.259945  |
| 1  | 1.358002   | 3.981539  | -0.124762 |
| 6  | -3.166625  | -0.145326 | 0.118241  |
| 6  | -3.533290  | -1.452265 | 0.369332  |
| 16 | -4.592100  | 0.832585  | -0.162646 |
| 6  | -4.930204  | -1.672118 | 0.326602  |
| 1  | -2.811519  | -2.242720 | 0.542450  |
| 6  | -5.668208  | -0.540570 | 0.039451  |
| 1  | -5.378763  | -2.649471 | 0.465864  |
| 1  | 4.564332   | 7.426840  | 1.080086  |
| 6  | -7.114061  | -0.409433 | -0.094382 |
| 6  | -7.706642  | 0.692835  | -0.743538 |
| 6  | -7.976091  | -1.398686 | 0.430048  |
| 6  | -9.082755  | 0.792307  | -0.861391 |
| 1  | -7.079493  | 1.467804  | -1.174617 |
| 6  | -9.351319  | -1.305166 | 0.305572  |
| 1  | -7.556046  | -2.246184 | 0.961941  |
| 6  | -9.946399  | -0.200478 | -0.346874 |
| 1  | -9.511251  | 1.652012  | -1.370679 |
| 1  | -9.967745  | -2.089101 | 0.726976  |
| 6  | -11.368910 | 0.003603  | -0.531974 |
| 6  | -12.452898 | -0.746173 | -0.172126 |
| 1  | -11.620302 | 0.922448  | -1.054591 |
| 6  | -12.380860 | -1.994231 | 0.521650  |
| 6  | -13.838480 | -0.306915 | -0.487281 |
| 7  | -12.306573 | -3.009258 | 1.086451  |
| 8  | -14.837575 | -0.929624 | -0.197036 |
| 8  | -13.885175 | 0.882174  | -1.144773 |
| 1  | -14.832437 | 1.058441  | -1.292254 |

Table S5 Cartesian coordinates for the optimized structure of **GJ5**

| At. No. | X         | Y         | Z         |
|---------|-----------|-----------|-----------|
| 6       | 2.623414  | 0.024282  | -0.005498 |
| 6       | 2.223150  | -1.232581 | 0.411073  |
| 16      | 1.218636  | 0.991044  | -0.431167 |
| 6       | 0.822792  | -1.415273 | 0.404335  |
| 1       | 2.922758  | -1.997388 | 0.732294  |
| 6       | 0.114093  | -0.305731 | -0.016884 |
| 1       | 0.341928  | -2.329390 | 0.733583  |
| 6       | -1.332050 | -0.144385 | -0.144383 |
| 6       | -2.165144 | -1.269935 | -0.290523 |
| 6       | -1.955198 | 1.111430  | -0.128644 |
| 6       | -3.542197 | -1.147114 | -0.422144 |
| 1       | -1.726409 | -2.260936 | -0.354457 |
| 6       | -3.337136 | 1.237582  | -0.222796 |
| 1       | -1.360386 | 2.011621  | -0.002012 |
| 6       | -4.176257 | 0.116013  | -0.361492 |
| 16      | -4.476587 | -2.598320 | -0.847856 |
| 1       | -3.758690 | 2.232305  | -0.173731 |
| 7       | -5.573933 | 0.239728  | -0.462844 |
| 6       | -6.037426 | -2.155334 | -0.119656 |
| 6       | -6.446528 | -0.806284 | -0.070198 |
| 6       | -6.145388 | 1.561804  | -0.750656 |
| 6       | -6.887938 | -3.179897 | 0.295687  |
| 6       | -7.756531 | -0.545373 | 0.367825  |
| 6       | -6.365214 | 2.508488  | 0.446659  |
| 1       | -7.097503 | 1.394674  | -1.265151 |
| 1       | -5.487498 | 2.043955  | -1.481836 |
| 1       | -6.528809 | -4.204746 | 0.261310  |
| 6       | -8.187454 | -2.901562 | 0.718924  |
| 6       | -8.617434 | -1.578519 | 0.741374  |
| 1       | -8.121020 | 0.471494  | 0.422862  |
| 6       | -6.953713 | 3.853715  | -0.000552 |
| 1       | -7.031421 | 2.041764  | 1.181539  |
| 1       | -5.419538 | 2.677648  | 0.974738  |
| 1       | -8.847638 | -3.708271 | 1.022409  |
| 1       | -9.625064 | -1.332899 | 1.064620  |
| 6       | -7.185867 | 4.822589  | 1.163243  |
| 1       | -6.281553 | 4.319336  | -0.735629 |
| 1       | -7.902905 | 3.679027  | -0.527172 |
| 1       | -7.606140 | 5.771433  | 0.812107  |
| 1       | -7.882177 | 4.400813  | 1.898066  |
| 1       | -6.248304 | 5.046104  | 1.686324  |
| 6       | 3.955130  | 0.559047  | -0.115015 |
| 6       | 4.339408  | 1.858520  | -0.430664 |
| 16      | 5.352661  | -0.458654 | 0.155596  |

|   |           |           |           |
|---|-----------|-----------|-----------|
| 6 | 5.729862  | 2.033142  | -0.449022 |
| 1 | 3.628653  | 2.652333  | -0.631867 |
| 6 | 6.454253  | 0.881406  | -0.149714 |
| 1 | 6.218191  | 2.976777  | -0.670296 |
| 6 | 7.876325  | 0.831544  | -0.107115 |
| 6 | 8.731098  | -0.203909 | 0.171497  |
| 1 | 8.354631  | 1.780304  | -0.335624 |
| 6 | 8.279465  | -1.518557 | 0.493292  |
| 6 | 10.201292 | -0.026117 | 0.158188  |
| 7 | 7.882372  | -2.582206 | 0.753118  |
| 8 | 11.005805 | -0.902416 | 0.396317  |
| 8 | 10.578989 | 1.244503  | -0.153931 |
| 1 | 11.553268 | 1.235612  | -0.131086 |
